# Supplementary material for: A comprehensive characterization of cis-acting splicing-associated variants in human cancer
Source: PubMed Central journal article supplement — Genome Res. 2018 Aug;28(8):1111–25. doi: 10.1101/gr.231951.117 (PMC6071634; doi:10.1101/gr.231951.117), 2018-08
Supplement: supp_gr.231951.117_Supplemental_Fig_S2.pdf [file supp_gr.231951.117_Supplemental_Fig_S2.pdf]

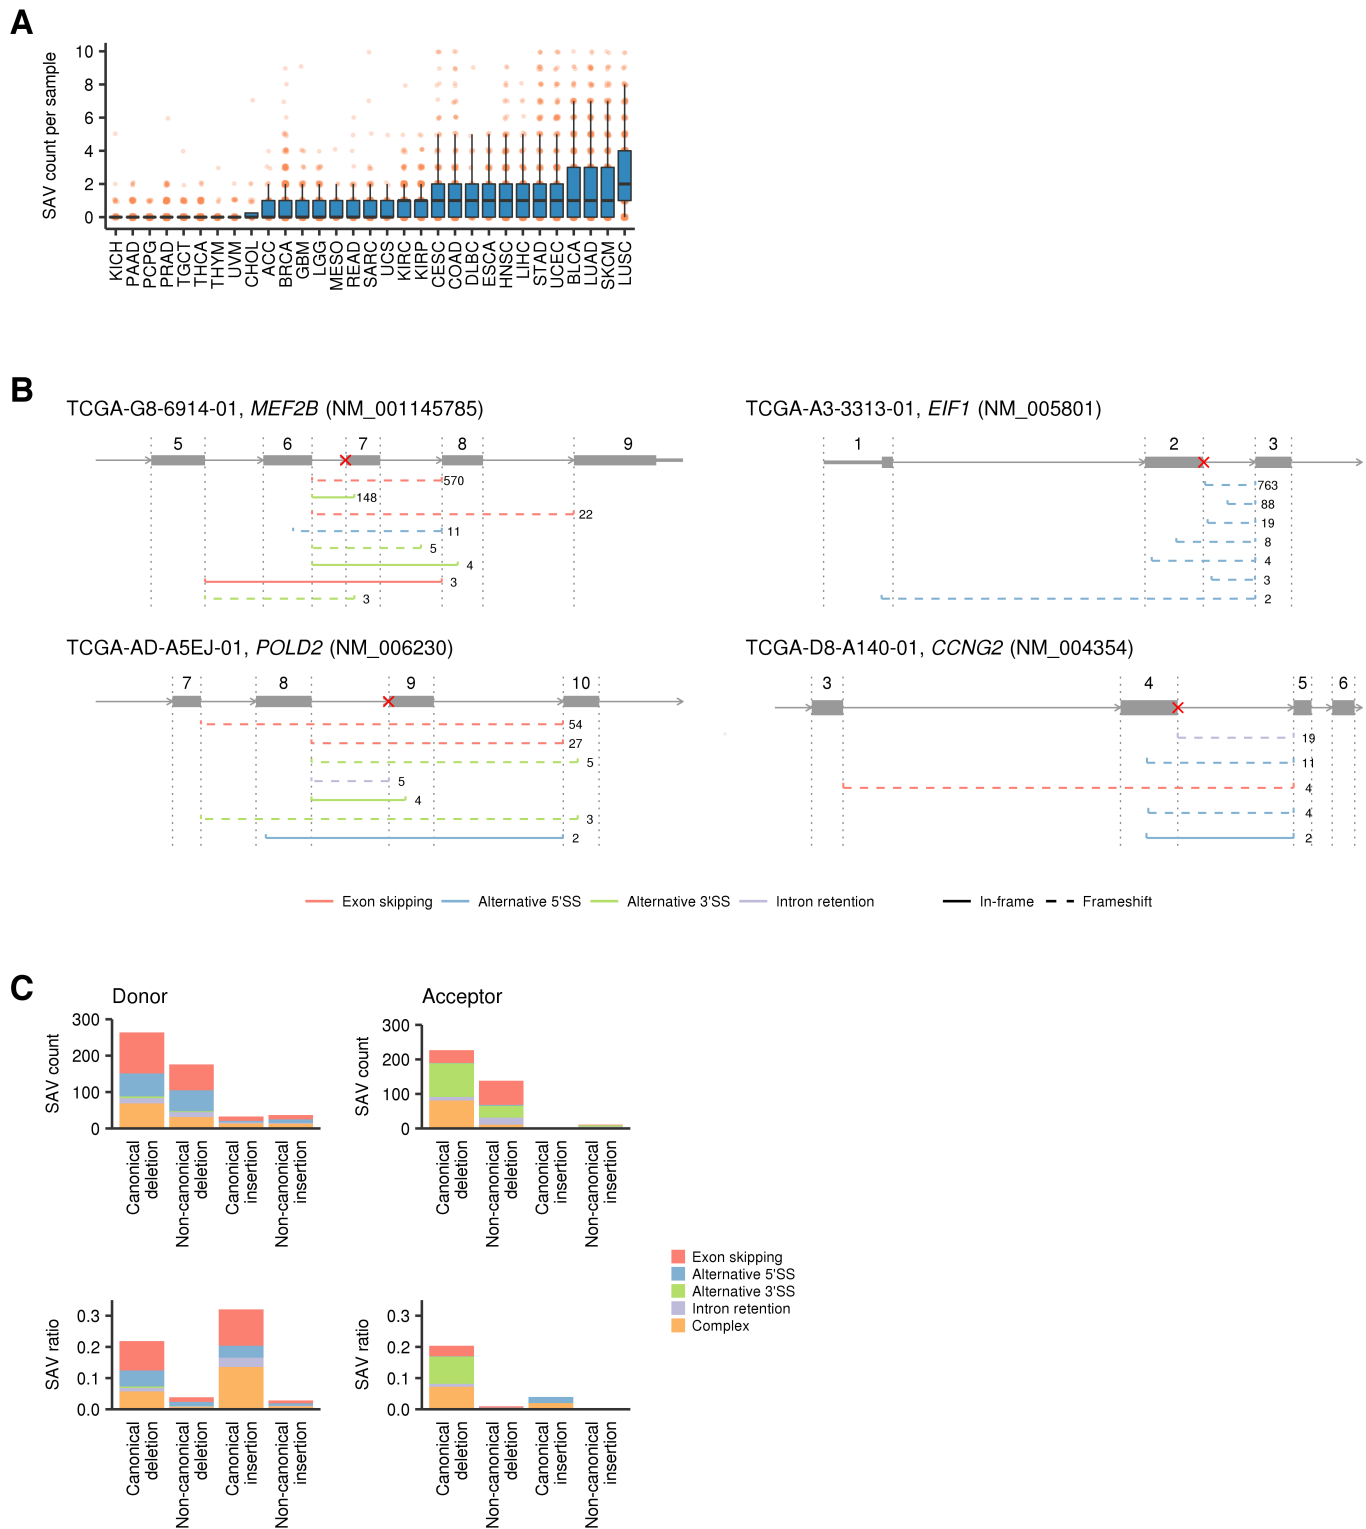

### Supplementary Figure 2: Overview of SAVs identified by SAVNet.

**(A)** Number of SAVs in each sample of 31 cancer types from the TCGA project. Each point corresponds to one sample of a cancer type. **(B)** Examples of SAVs associated with multiple ( $\geq 5$ ) splicing alterations. Different colors indicate different types of splicing alterations. The solid and dashed lines represent in-frame and frameshift alterations, respectively. The number at each line represents the count of supporting reads. **(C)** Number of splicing-associated indels disrupting splice donor and acceptor sites (upper) and their fraction relative to total indels (lower) at canonical or non-canonical sites.
