# Supplementary material for: A comprehensive characterization of cis-acting splicing-associated variants in human cancer
Source: PubMed Central journal article supplement — Genome Res. 2018 Aug;28(8):1111–25. doi: 10.1101/gr.231951.117 (PMC6071634; doi:10.1101/gr.231951.117), 2018-08
Supplement: supp_gr.231951.117_Supplemental_Fig_S3.pdf [file supp_gr.231951.117_Supplemental_Fig_S3.pdf]

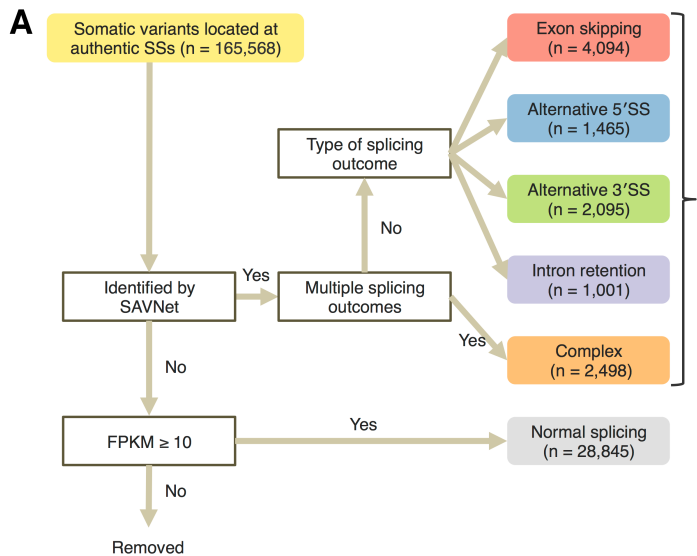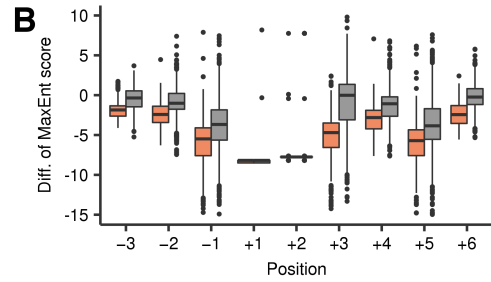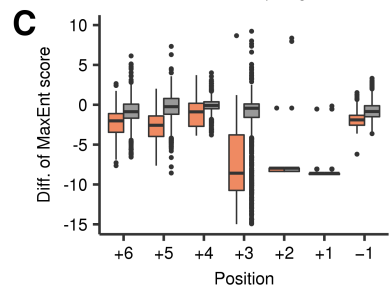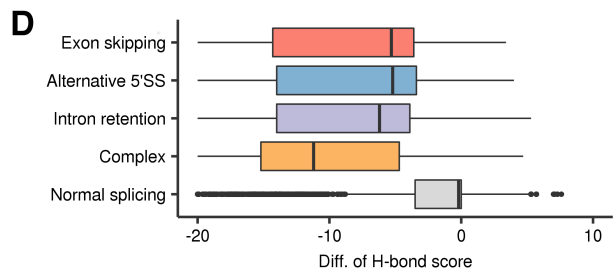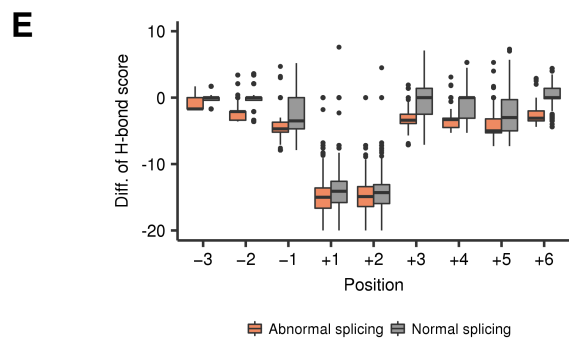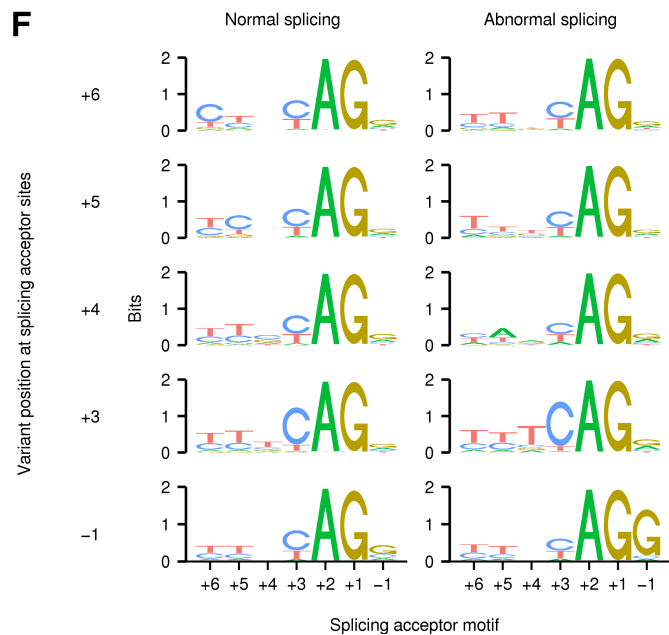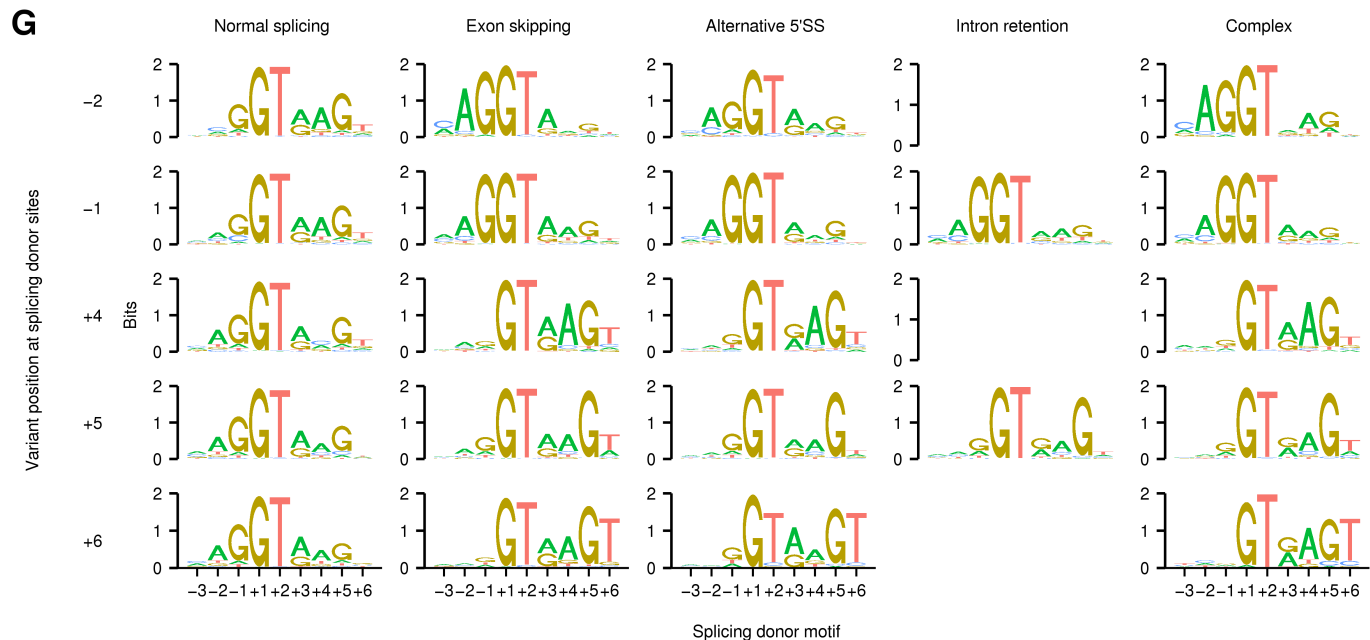

**Supplementary Figure 3: Genomic features of SSs affected by SS-disrupting SAVs based on their splicing outcomes.**

**(A)** Schematics depicting the classification methods for somatic variants affecting authentic SSs by their splicing outcomes. **(B, C)** Changes in MaxEnt scores by somatic variants were compared between normal and abnormal splicing groups according to the substituted position of donor **(B)** or acceptor **(C)** sites. “Normal splicing” represents samples lacking the relevant splicing alterations in the presence of somatic variants. **(D)** Change in H-bond scores triggered by somatic variants at authentic splicing donor sites according to splicing outcomes. **(E)** Changes in H-bond scores by somatic variants were compared between normal and abnormal splicing groups according to the substituted position of donor sites. **(F)** Sequence motifs of splicing acceptor sites at which somatic SNVs lead to normal (left) or abnormal splicing (right; identified by SAVNet) according to the variant position. **(G)** Sequence motifs of splicing donor sites at which somatic SNVs lead to normal splicing, exon skipping, alternative 5'SS, intron retention, or complex abnormalities. Categories whose number of SAVs is less than 25 are not displayed.
