# Supplementary material for: A comprehensive characterization of cis-acting splicing-associated variants in human cancer
Source: PubMed Central journal article supplement — Genome Res. 2018 Aug;28(8):1111–25. doi: 10.1101/gr.231951.117 (PMC6071634; doi:10.1101/gr.231951.117), 2018-08
Supplement: supp_gr.231951.117_Supplemental_Fig_S7.pdf [file supp_gr.231951.117_Supplemental_Fig_S7.pdf]

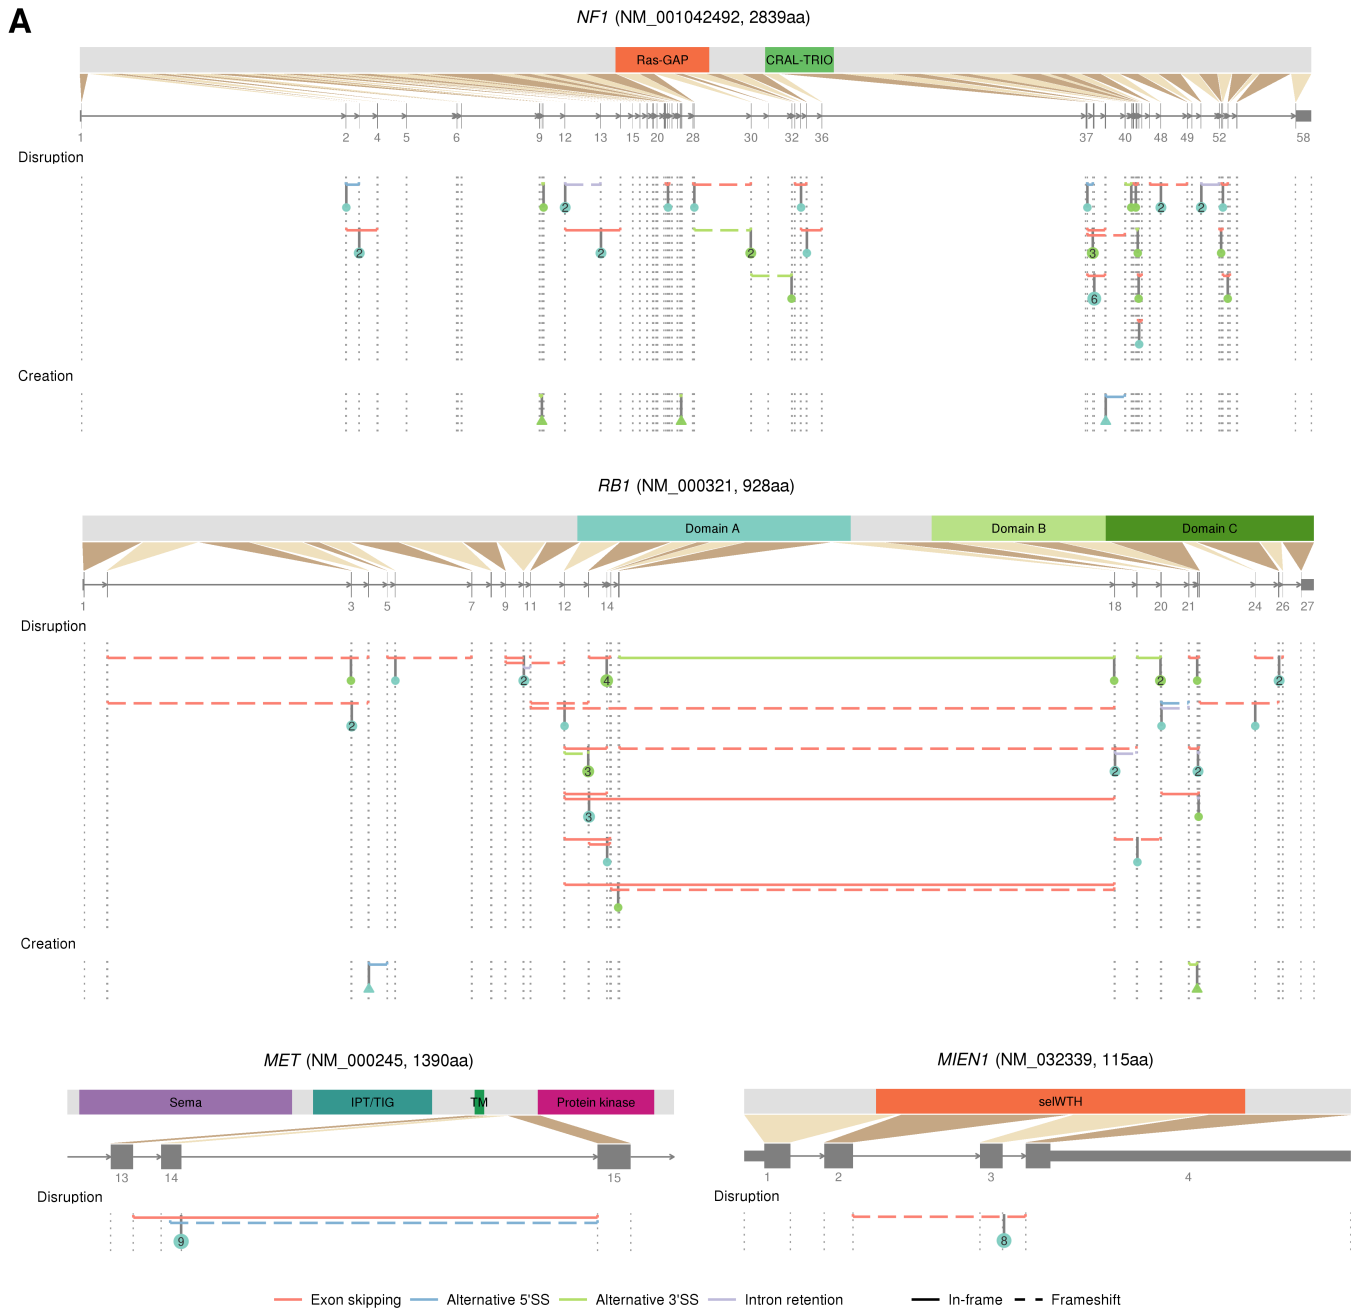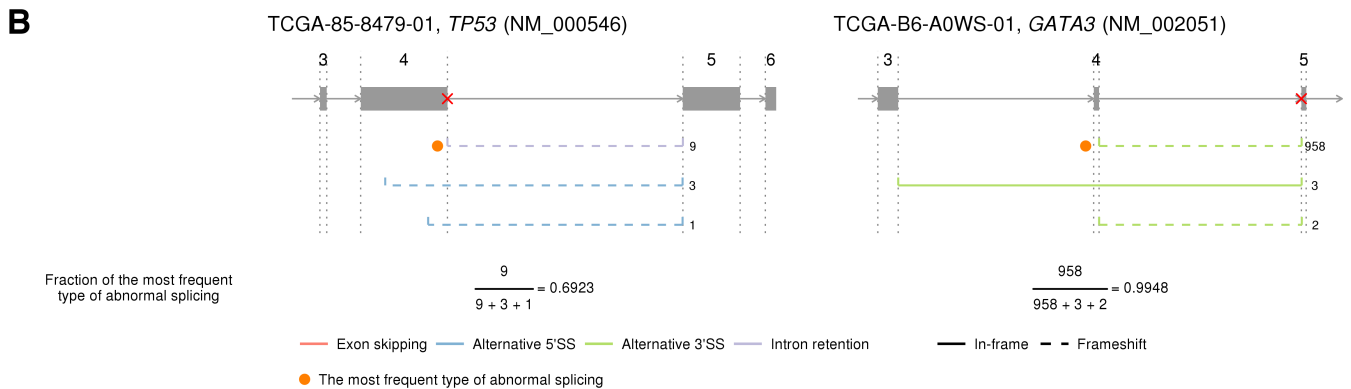

**Supplementary Figure 7: Genes frequently affected by SAVs in human cancers.**

**(A)** Distribution of SAVs and their resultant splicing outcomes for *NF1* (upper), *RB1* (middle), *MET* (lower left),

and *MIEN1* (lower right). SS-disrupting SAVs are aggregated according to the authentic SSs. The number in circles represents the number of SAVs for each SS. **(B)** Schematics depicting methods to quantify the fraction of the most frequent relative to total associated splicing outcomes for each SS-level SAV hotspot. The number at each line represents the count of supporting reads.
