# Supplementary material for: A comprehensive characterization of cis -acting splicing-associated variants in human cancer
Source: HighWire-hosted journal article supplement (doi:10.1101/gr.231951.117), 2018-07-16
Supplement: Supplemental_Table_S2.xlsx [file Supplemental_Table_S2.xlsx]

## Sheet: S2_Sample_list
Supplementary Table 2. List of samples used in this study and the frequencies of their somatic variants
Cancer type	Sample name	SNV count	Indel count	SAV count
ACC	TCGA-OR-A5J1-01	69	7	0
ACC	TCGA-OR-A5J2-01	73	8	1
ACC	TCGA-OR-A5J3-01	47	3	1
ACC	TCGA-OR-A5J5-01	755	183	0
ACC	TCGA-OR-A5J6-01	64	2	1
ACC	TCGA-OR-A5J7-01	120	8	0
ACC	TCGA-OR-A5J8-01	239	4	1
ACC	TCGA-OR-A5J9-01	83	6	1
ACC	TCGA-OR-A5JA-01	1133	12	4
ACC	TCGA-OR-A5JB-01	846	19	2
ACC	TCGA-OR-A5JC-01	62	3	0
ACC	TCGA-OR-A5JD-01	51	4	0
ACC	TCGA-OR-A5JE-01	117	8	2
ACC	TCGA-OR-A5JF-01	172	4	0
ACC	TCGA-OR-A5JG-01	76	5	1
ACC	TCGA-OR-A5JI-01	15	2	0
ACC	TCGA-OR-A5JJ-01	35	3	0
ACC	TCGA-OR-A5JK-01	58	4	0
ACC	TCGA-OR-A5JL-01	22	3	0
ACC	TCGA-OR-A5JM-01	135	23	1
ACC	TCGA-OR-A5JO-01	12	2	0
ACC	TCGA-OR-A5JP-01	135	16	0
ACC	TCGA-OR-A5JQ-01	20	0	1
ACC	TCGA-OR-A5JR-01	26	1	0
ACC	TCGA-OR-A5JS-01	84	6	0
ACC	TCGA-OR-A5JT-01	61	3	0
ACC	TCGA-OR-A5JV-01	66	1	0
ACC	TCGA-OR-A5JW-01	72	6	0
ACC	TCGA-OR-A5JX-01	67	4	0
ACC	TCGA-OR-A5JY-01	186	12	0
ACC	TCGA-OR-A5JZ-01	40	6	0
ACC	TCGA-OR-A5K0-01	140	33	0
ACC	TCGA-OR-A5K1-01	35	4	1
ACC	TCGA-OR-A5K2-01	99	10	1
ACC	TCGA-OR-A5K3-01	36	5	0
ACC	TCGA-OR-A5K4-01	585	9	0
ACC	TCGA-OR-A5K5-01	232	30	0
ACC	TCGA-OR-A5K6-01	60	5	1
ACC	TCGA-OR-A5K8-01	74	4	0
ACC	TCGA-OR-A5K9-01	263	8	0
ACC	TCGA-OR-A5KO-01	85	2	0
ACC	TCGA-OR-A5KT-01	58	8	0
ACC	TCGA-OR-A5KU-01	69	2	0
ACC	TCGA-OR-A5KV-01	38	4	0
ACC	TCGA-OR-A5KW-01	65	2	0
ACC	TCGA-OR-A5KX-01	90	17	0
ACC	TCGA-OR-A5KY-01	65	4	0
ACC	TCGA-OR-A5KZ-01	59	9	1
ACC	TCGA-OR-A5L3-01	51	2	0
ACC	TCGA-OR-A5L4-01	52	5	0
ACC	TCGA-OR-A5L5-01	22	3	0
ACC	TCGA-OR-A5L6-01	96	9	0
ACC	TCGA-OR-A5L8-01	32	1	0
ACC	TCGA-OR-A5L9-01	31	1	0
ACC	TCGA-OR-A5LA-01	16	3	0
ACC	TCGA-OR-A5LB-01	499	328	0
ACC	TCGA-OR-A5LC-01	119	5	2
ACC	TCGA-OR-A5LD-01	141	23	0
ACC	TCGA-OR-A5LE-01	47	9	0
ACC	TCGA-OR-A5LG-01	61	4	1
ACC	TCGA-OR-A5LH-01	21	4	0
ACC	TCGA-OR-A5LJ-01	854	380	3
ACC	TCGA-OR-A5LK-01	82	1	0
ACC	TCGA-OR-A5LL-01	113	8	1
ACC	TCGA-OR-A5LM-01	53	2	0
ACC	TCGA-OR-A5LN-01	32	2	0
ACC	TCGA-OR-A5LO-01	180	10	1
ACC	TCGA-OR-A5LP-01	31	1	0
ACC	TCGA-OR-A5LR-01	31	1	0
ACC	TCGA-OR-A5LS-01	42	1	0
ACC	TCGA-OR-A5LT-01	44	10	0
ACC	TCGA-OU-A5PI-01	75	3	1
ACC	TCGA-P6-A5OF-01	72	4	1
ACC	TCGA-P6-A5OG-01	472	16	3
ACC	TCGA-PA-A5YG-01	21	0	0
ACC	TCGA-PK-A5H8-01	52	7	1
ACC	TCGA-PK-A5H9-01	23	0	0
ACC	TCGA-PK-A5HA-01	105	7	0
ACC	TCGA-PK-A5HB-01	3008	578	14
BLCA	TCGA-2F-A9KO-01	994	6	3
BLCA	TCGA-2F-A9KP-01	321	16	2
BLCA	TCGA-2F-A9KQ-01	136	4	1
BLCA	TCGA-2F-A9KR-01	520	7	4
BLCA	TCGA-2F-A9KT-01	699	14	3
BLCA	TCGA-2F-A9KW-01	282	12	1
BLCA	TCGA-4Z-AA7M-01	1096	13	7
BLCA	TCGA-4Z-AA7N-01	17	0	0
BLCA	TCGA-4Z-AA7O-01	432	13	4
BLCA	TCGA-4Z-AA7Q-01	405	11	1
BLCA	TCGA-4Z-AA7R-01	794	16	3
BLCA	TCGA-4Z-AA7S-01	111	10	0
BLCA	TCGA-4Z-AA7W-01	912	10	4
BLCA	TCGA-4Z-AA7Y-01	678	9	3
BLCA	TCGA-4Z-AA80-01	746	12	3
BLCA	TCGA-4Z-AA81-01	419	9	3
BLCA	TCGA-4Z-AA82-01	171	12	0
BLCA	TCGA-4Z-AA83-01	183	5	1
BLCA	TCGA-4Z-AA84-01	1055	24	7
BLCA	TCGA-4Z-AA86-01	351	6	2
BLCA	TCGA-4Z-AA87-01	485	22	1
BLCA	TCGA-4Z-AA89-01	244	5	0
BLCA	TCGA-5N-A9KI-01	362	12	2
BLCA	TCGA-5N-A9KM-01	462	16	1
BLCA	TCGA-BL-A0C8-01	274	15	2
BLCA	TCGA-BL-A13I-01	198	6	2
BLCA	TCGA-BL-A13J-01	252	9	3
BLCA	TCGA-BL-A3JM-01	417	10	4
BLCA	TCGA-BL-A5ZZ-01	345	10	1
BLCA	TCGA-BT-A0S7-01	83	6	1
BLCA	TCGA-BT-A0YX-01	1419	7	3
BLCA	TCGA-BT-A20J-01	867	6	3
BLCA	TCGA-BT-A20N-01	507	25	3
BLCA	TCGA-BT-A20O-01	239	5	1
BLCA	TCGA-BT-A20P-01	220	7	0
BLCA	TCGA-BT-A20Q-01	198	10	1
BLCA	TCGA-BT-A20R-01	482	10	1
BLCA	TCGA-BT-A20T-01	602	11	4
BLCA	TCGA-BT-A20U-01	163	2	0
BLCA	TCGA-BT-A20V-01	194	13	2
BLCA	TCGA-BT-A20W-01	114	3	0
BLCA	TCGA-BT-A20X-01	145	5	1
BLCA	TCGA-BT-A2LA-01	521	13	1
BLCA	TCGA-BT-A2LB-01	1305	37	6
BLCA	TCGA-BT-A2LD-01	164	9	0
BLCA	TCGA-BT-A3PH-01	1015	13	4
BLCA	TCGA-BT-A3PJ-01	1060	23	9
BLCA	TCGA-BT-A3PK-01	539	19	4
BLCA	TCGA-BT-A42C-01	697	27	4
BLCA	TCGA-BT-A42E-01	385	5	2
BLCA	TCGA-BT-A42F-01	241	2	1
BLCA	TCGA-C4-A0EZ-01	467	11	2
BLCA	TCGA-C4-A0F0-01	206	25	1
BLCA	TCGA-C4-A0F1-01	425	5	0
BLCA	TCGA-C4-A0F6-01	456	5	3
BLCA	TCGA-C4-A0F7-01	194	13	2
BLCA	TCGA-CF-A1HR-01	480	7	2
BLCA	TCGA-CF-A1HS-01	426	11	0
BLCA	TCGA-CF-A27C-01	364	6	2
BLCA	TCGA-CF-A3MF-01	41	2	0
BLCA	TCGA-CF-A3MG-01	256	8	1
BLCA	TCGA-CF-A3MH-01	95	7	0
BLCA	TCGA-CF-A3MI-01	125	7	0
BLCA	TCGA-CF-A47S-01	38	7	1
BLCA	TCGA-CF-A47T-01	51	8	0
BLCA	TCGA-CF-A47V-01	167	3	2
BLCA	TCGA-CF-A47W-01	53	0	0
BLCA	TCGA-CF-A47X-01	698	14	2
BLCA	TCGA-CF-A47Y-01	141	7	1
BLCA	TCGA-CF-A5U8-01	152	2	3
BLCA	TCGA-CF-A5UA-01	172	4	2
BLCA	TCGA-CF-A7I0-01	120	3	0
BLCA	TCGA-CF-A8HX-01	147	3	0
BLCA	TCGA-CF-A8HY-01	192	8	0
BLCA	TCGA-CF-A9FF-01	292	10	1
BLCA	TCGA-CF-A9FH-01	78	8	0
BLCA	TCGA-CF-A9FL-01	126	19	1
BLCA	TCGA-CF-A9FM-01	42	7	1
BLCA	TCGA-CU-A0YN-01	344	13	4
BLCA	TCGA-CU-A0YO-01	167	13	0
BLCA	TCGA-CU-A0YR-01	320	26	2
BLCA	TCGA-CU-A3KJ-01	475	7	4
BLCA	TCGA-CU-A3QU-01	248	7	1
BLCA	TCGA-CU-A3YL-01	470	14	2
BLCA	TCGA-CU-A5W6-01	458	10	2
BLCA	TCGA-CU-A72E-01	206	9	0
BLCA	TCGA-DK-A1A3-01	1329	23	6
BLCA	TCGA-DK-A1A5-01	670	14	2
BLCA	TCGA-DK-A1A6-01	755	18	3
BLCA	TCGA-DK-A1A7-01	485	24	1
BLCA	TCGA-DK-A1AA-01	184	9	1
BLCA	TCGA-DK-A1AB-01	450	1	4
BLCA	TCGA-DK-A1AC-01	3454	41	18
BLCA	TCGA-DK-A1AD-01	532	17	3
BLCA	TCGA-DK-A1AE-01	261	11	0
BLCA	TCGA-DK-A1AF-01	98	0	0
BLCA	TCGA-DK-A1AG-01	274	6	2
BLCA	TCGA-DK-A2HX-01	159	3	0
BLCA	TCGA-DK-A2I1-01	582	11	1
BLCA	TCGA-DK-A2I2-01	276	7	0
BLCA	TCGA-DK-A2I4-01	1365	4	5
BLCA	TCGA-DK-A2I6-01	577	14	2
BLCA	TCGA-DK-A3IK-01	349	7	3
BLCA	TCGA-DK-A3IL-01	335	15	1
BLCA	TCGA-DK-A3IM-01	155	8	1
BLCA	TCGA-DK-A3IN-01	760	7	2
BLCA	TCGA-DK-A3IQ-01	285	6	0
BLCA	TCGA-DK-A3IS-01	655	7	4
BLCA	TCGA-DK-A3IT-01	851	5	6
BLCA	TCGA-DK-A3IU-01	594	7	6
BLCA	TCGA-DK-A3IV-01	142	1	1
BLCA	TCGA-DK-A3WW-01	2441	9	5
BLCA	TCGA-DK-A3WX-01	79	7	0
BLCA	TCGA-DK-A3WY-01	6	0	0
BLCA	TCGA-DK-A3X1-01	1777	6	5
BLCA	TCGA-DK-A3X2-01	234	20	0
BLCA	TCGA-DK-A6AV-01	259	10	1
BLCA	TCGA-DK-A6AW-01	10599	61	14
BLCA	TCGA-DK-A6B0-01	45	5	1
BLCA	TCGA-DK-A6B1-01	310	21	0
BLCA	TCGA-DK-A6B2-01	412	26	0
BLCA	TCGA-DK-A6B5-01	305	3	1
BLCA	TCGA-DK-A6B6-01	2120	15	5
BLCA	TCGA-DK-AA6L-01	770	31	5
BLCA	TCGA-DK-AA6M-01	122	5	0
BLCA	TCGA-DK-AA6P-01	300	6	4
BLCA	TCGA-DK-AA6Q-01	259	12	0
BLCA	TCGA-DK-AA6R-01	553	12	3
BLCA	TCGA-DK-AA6S-01	1180	16	6
BLCA	TCGA-DK-AA6T-01	221	3	1
BLCA	TCGA-DK-AA6U-01	824	17	3
BLCA	TCGA-DK-AA6W-01	570	12	5
BLCA	TCGA-DK-AA6X-01	195	1	2
BLCA	TCGA-DK-AA71-01	1527	15	4
BLCA	TCGA-DK-AA74-01	293	2	0
BLCA	TCGA-DK-AA75-01	933	13	3
BLCA	TCGA-DK-AA76-01	463	16	3
BLCA	TCGA-DK-AA77-01	918	6	8
BLCA	TCGA-E5-A2PC-01	529	13	5
BLCA	TCGA-E5-A4TZ-01	951	35	11
BLCA	TCGA-E5-A4U1-01	1393	13	3
BLCA	TCGA-E7-A3X6-01	276	8	4
BLCA	TCGA-E7-A3Y1-01	331	28	4
BLCA	TCGA-E7-A4IJ-01	657	7	1
BLCA	TCGA-E7-A4XJ-01	78	10	0
BLCA	TCGA-E7-A519-01	130	12	1
BLCA	TCGA-E7-A541-01	582	25	1
BLCA	TCGA-E7-A5KE-01	469	16	2
BLCA	TCGA-E7-A5KF-01	494	12	3
BLCA	TCGA-E7-A677-01	519	31	4
BLCA	TCGA-E7-A678-01	118	4	0
BLCA	TCGA-E7-A6MD-01	974	12	2
BLCA	TCGA-E7-A6ME-01	324	16	1
BLCA	TCGA-E7-A6MF-01	111	1	0
BLCA	TCGA-E7-A7DU-01	538	3	0
BLCA	TCGA-E7-A7DV-01	536	5	2
BLCA	TCGA-E7-A7PW-01	192	11	1
BLCA	TCGA-E7-A7XN-01	1687	10	8
BLCA	TCGA-E7-A85H-01	932	47	8
BLCA	TCGA-E7-A8O7-01	67	7	1
BLCA	TCGA-E7-A8O8-01	250	15	1
BLCA	TCGA-E7-A97P-01	379	22	0
BLCA	TCGA-E7-A97Q-01	138	16	0
BLCA	TCGA-FD-A3B3-01	216	9	0
BLCA	TCGA-FD-A3B4-01	152	8	0
BLCA	TCGA-FD-A3B5-01	292	11	2
BLCA	TCGA-FD-A3B6-01	511	12	1
BLCA	TCGA-FD-A3B7-01	84	2	1
BLCA	TCGA-FD-A3B8-01	15	0	0
BLCA	TCGA-FD-A3N5-01	624	26	7
BLCA	TCGA-FD-A3N6-01	234	16	1
BLCA	TCGA-FD-A3NA-01	344	10	1
BLCA	TCGA-FD-A3SJ-01	521	13	2
BLCA	TCGA-FD-A3SL-01	508	19	2
BLCA	TCGA-FD-A3SM-01	449	13	3
BLCA	TCGA-FD-A3SN-01	1022	28	4
BLCA	TCGA-FD-A3SO-01	788	8	2
BLCA	TCGA-FD-A3SP-01	208	9	0
BLCA	TCGA-FD-A3SQ-01	151	6	2
BLCA	TCGA-FD-A3SR-01	272	8	0
BLCA	TCGA-FD-A3SS-01	962	13	3
BLCA	TCGA-FD-A43N-01	357	21	4
BLCA	TCGA-FD-A43P-01	745	7	4
BLCA	TCGA-FD-A43S-01	0	0	0
BLCA	TCGA-FD-A43U-01	105	6	0
BLCA	TCGA-FD-A43X-01	792	13	3
BLCA	TCGA-FD-A43Y-01	103	8	1
BLCA	TCGA-FD-A5BR-01	132	14	0
BLCA	TCGA-FD-A5BS-01	25	0	0
BLCA	TCGA-FD-A5BT-01	175	2	0
BLCA	TCGA-FD-A5BU-01	114	7	0
BLCA	TCGA-FD-A5BV-01	228	8	1
BLCA	TCGA-FD-A5BX-01	700	5	3
BLCA	TCGA-FD-A5BY-01	95	4	1
BLCA	TCGA-FD-A5BZ-01	247	5	2
BLCA	TCGA-FD-A5C0-01	257	20	3
BLCA	TCGA-FD-A5C1-01	219	4	0
BLCA	TCGA-FD-A62N-01	164	9	1
BLCA	TCGA-FD-A62O-01	482	14	0
BLCA	TCGA-FD-A62P-01	663	8	1
BLCA	TCGA-FD-A62S-01	130	8	0
BLCA	TCGA-FD-A6TA-01	568	4	2
BLCA	TCGA-FD-A6TB-01	371	3	1
BLCA	TCGA-FD-A6TC-01	2160	20	4
BLCA	TCGA-FD-A6TD-01	267	10	0
BLCA	TCGA-FD-A6TE-01	559	4	3
BLCA	TCGA-FD-A6TF-01	260	7	2
BLCA	TCGA-FD-A6TG-01	616	13	2
BLCA	TCGA-FD-A6TH-01	353	7	0
BLCA	TCGA-FD-A6TI-01	238	14	3
BLCA	TCGA-FD-A6TK-01	189	7	0
BLCA	TCGA-FJ-A3Z7-01	655	8	0
BLCA	TCGA-FJ-A3Z9-01	142	6	1
BLCA	TCGA-FJ-A3ZE-01	918	31	10
BLCA	TCGA-FJ-A3ZF-01	566	15	3
BLCA	TCGA-FJ-A871-01	104	6	0
BLCA	TCGA-FT-A3EE-01	279	15	1
BLCA	TCGA-FT-A61P-01	296	8	1
BLCA	TCGA-G2-A2EC-01	338	8	1
BLCA	TCGA-G2-A2EF-01	587	15	1
BLCA	TCGA-G2-A2EJ-01	637	14	2
BLCA	TCGA-G2-A2EK-01	102	4	0
BLCA	TCGA-G2-A2EL-01	582	5	6
BLCA	TCGA-G2-A2EO-01	1729	14	2
BLCA	TCGA-G2-A2ES-01	1016	45	7
BLCA	TCGA-G2-A3IB-01	200	6	1
BLCA	TCGA-G2-A3IE-01	692	20	7
BLCA	TCGA-G2-A3VY-01	1594	26	14
BLCA	TCGA-G2-AA3B-01	1375	22	7
BLCA	TCGA-G2-AA3C-01	507	13	0
BLCA	TCGA-G2-AA3D-01	289	10	1
BLCA	TCGA-G2-AA3F-01	256	21	3
BLCA	TCGA-GC-A3BM-01	287	11	1
BLCA	TCGA-GC-A3I6-01	364	3	1
BLCA	TCGA-GC-A3OO-01	184	1	0
BLCA	TCGA-GC-A3RB-01	328	8	3
BLCA	TCGA-GC-A3RC-01	880	37	5
BLCA	TCGA-GC-A3RD-01	170	10	0
BLCA	TCGA-GC-A3WC-01	293	7	0
BLCA	TCGA-GC-A3YS-01	555	6	3
BLCA	TCGA-GC-A4ZW-01	1159	14	2
BLCA	TCGA-GC-A6I1-01	463	6	2
BLCA	TCGA-GC-A6I3-01	391	4	0
BLCA	TCGA-GD-A2C5-01	528	15	1
BLCA	TCGA-GD-A3OP-01	416	10	1
BLCA	TCGA-GD-A3OQ-01	152	7	2
BLCA	TCGA-GD-A3OS-01	196	5	0
BLCA	TCGA-GD-A6C6-01	673	14	0
BLCA	TCGA-GD-A76B-01	307	5	4
BLCA	TCGA-GU-A42P-01	472	11	2
BLCA	TCGA-GU-A42Q-01	357	8	3
BLCA	TCGA-GU-A42R-01	415	9	5
BLCA	TCGA-GU-A762-01	203	8	0
BLCA	TCGA-GU-A763-01	121	7	0
BLCA	TCGA-GU-A764-01	155	5	0
BLCA	TCGA-GU-A766-01	377	4	2
BLCA	TCGA-GU-A767-01	620	17	0
BLCA	TCGA-GU-AATO-01	574	4	0
BLCA	TCGA-GU-AATP-01	640	17	5
BLCA	TCGA-GU-AATQ-01	359	7	1
BLCA	TCGA-GV-A3JV-01	189	10	0
BLCA	TCGA-GV-A3JW-01	153	2	2
BLCA	TCGA-GV-A3JX-01	502	10	3
BLCA	TCGA-GV-A3JZ-01	887	10	5
BLCA	TCGA-GV-A3QF-01	293	15	2
BLCA	TCGA-GV-A3QG-01	170	7	0
BLCA	TCGA-GV-A3QH-01	348	7	3
BLCA	TCGA-GV-A3QI-01	955	32	5
BLCA	TCGA-GV-A3QK-01	326	15	3
BLCA	TCGA-GV-A40E-01	266	9	0
BLCA	TCGA-GV-A40G-01	327	20	1
BLCA	TCGA-GV-A6ZA-01	632	14	1
BLCA	TCGA-H4-A2HO-01	220	11	0
BLCA	TCGA-H4-A2HQ-01	905	12	7
BLCA	TCGA-HQ-A2OE-01	288	11	2
BLCA	TCGA-HQ-A2OF-01	214	12	1
BLCA	TCGA-HQ-A5ND-01	171	10	2
BLCA	TCGA-HQ-A5NE-01	665	9	1
BLCA	TCGA-K4-A3WS-01	516	17	2
BLCA	TCGA-K4-A3WU-01	291	3	0
BLCA	TCGA-K4-A3WV-01	112	7	1
BLCA	TCGA-K4-A4AB-01	197	8	1
BLCA	TCGA-K4-A4AC-01	231	8	0
BLCA	TCGA-K4-A54R-01	1945	9	6
BLCA	TCGA-K4-A5RH-01	370	9	0
BLCA	TCGA-K4-A5RI-01	291	12	0
BLCA	TCGA-K4-A5RJ-01	805	7	2
BLCA	TCGA-K4-A6FZ-01	881	16	1
BLCA	TCGA-K4-A6MB-01	826	9	8
BLCA	TCGA-K4-A83P-01	278	5	1
BLCA	TCGA-K4-AAQO-01	450	5	0
BLCA	TCGA-KQ-A41N-01	886	30	3
BLCA	TCGA-KQ-A41O-01	558	10	3
BLCA	TCGA-KQ-A41P-01	683	10	1
BLCA	TCGA-KQ-A41Q-01	307	12	3
BLCA	TCGA-KQ-A41R-01	1664	47	9
BLCA	TCGA-KQ-A41S-01	392	5	3
BLCA	TCGA-LC-A66R-01	258	7	1
BLCA	TCGA-LT-A5Z6-01	960	3	3
BLCA	TCGA-LT-A8JT-01	155	7	1
BLCA	TCGA-MV-A51V-01	2510	12	6
BLCA	TCGA-PQ-A6FI-01	354	11	0
BLCA	TCGA-PQ-A6FN-01	127	10	2
BLCA	TCGA-R3-A69X-01	342	3	0
BLCA	TCGA-S5-A6DX-01	1452	12	4
BLCA	TCGA-S5-AA26-01	519	7	1
BLCA	TCGA-SY-A9G0-01	66	0	0
BLCA	TCGA-SY-A9G5-01	2002	18	11
BLCA	TCGA-UY-A78K-01	1343	62	4
BLCA	TCGA-UY-A78L-01	438	13	2
BLCA	TCGA-UY-A78M-01	295	10	2
BLCA	TCGA-UY-A78N-01	553	27	2
BLCA	TCGA-UY-A78O-01	309	10	0
BLCA	TCGA-UY-A78P-01	431	4	0
BLCA	TCGA-UY-A8OB-01	659	36	4
BLCA	TCGA-UY-A8OC-01	222	4	0
BLCA	TCGA-UY-A8OD-01	202	12	0
BLCA	TCGA-UY-A9PA-01	208	10	0
BLCA	TCGA-UY-A9PB-01	971	28	7
BLCA	TCGA-UY-A9PD-01	600	27	1
BLCA	TCGA-UY-A9PE-01	450	11	0
BLCA	TCGA-UY-A9PF-01	914	13	2
BLCA	TCGA-UY-A9PH-01	727	8	2
BLCA	TCGA-XF-A8HB-01	162	10	0
BLCA	TCGA-XF-A8HC-01	346	13	0
BLCA	TCGA-XF-A8HD-01	908	12	2
BLCA	TCGA-XF-A8HE-01	763	6	3
BLCA	TCGA-XF-A8HF-01	285	8	2
BLCA	TCGA-XF-A8HG-01	606	63	0
BLCA	TCGA-XF-A8HH-01	220	5	0
BLCA	TCGA-XF-A8HI-01	159	4	0
BLCA	TCGA-XF-A9SH-01	84	1	1
BLCA	TCGA-XF-A9SI-01	449	1	2
BLCA	TCGA-XF-A9SJ-01	400	5	0
BLCA	TCGA-XF-A9SK-01	287	6	0
BLCA	TCGA-XF-A9SL-01	79	4	2
BLCA	TCGA-XF-A9SM-01	359	3	0
BLCA	TCGA-XF-A9SP-01	526	8	1
BLCA	TCGA-XF-A9ST-01	1189	42	9
BLCA	TCGA-XF-A9SU-01	93	4	1
BLCA	TCGA-XF-A9SV-01	134	4	2
BLCA	TCGA-XF-A9SW-01	82	3	1
BLCA	TCGA-XF-A9SX-01	204	16	0
BLCA	TCGA-XF-A9SY-01	620	4	5
BLCA	TCGA-XF-A9SZ-01	343	12	2
BLCA	TCGA-XF-A9T0-01	1838	47	7
BLCA	TCGA-XF-A9T2-01	186	5	0
BLCA	TCGA-XF-A9T3-01	811	19	2
BLCA	TCGA-XF-A9T4-01	94	5	1
BLCA	TCGA-XF-A9T5-01	1358	7	7
BLCA	TCGA-XF-A9T6-01	733	33	5
BLCA	TCGA-XF-A9T8-01	1226	8	2
BLCA	TCGA-XF-AAME-01	16	0	0
BLCA	TCGA-XF-AAMG-01	2009	25	8
BLCA	TCGA-XF-AAMH-01	118	12	0
BLCA	TCGA-XF-AAMJ-01	52	3	0
BLCA	TCGA-XF-AAML-01	986	14	3
BLCA	TCGA-XF-AAMQ-01	493	4	5
BLCA	TCGA-XF-AAMR-01	190	6	2
BLCA	TCGA-XF-AAMT-01	206	23	2
BLCA	TCGA-XF-AAMW-01	60	1	0
BLCA	TCGA-XF-AAMX-01	711	17	7
BLCA	TCGA-XF-AAMY-01	221	6	0
BLCA	TCGA-XF-AAMZ-01	377	3	1
BLCA	TCGA-XF-AAN0-01	878	6	5
BLCA	TCGA-XF-AAN1-01	173	8	2
BLCA	TCGA-XF-AAN2-01	1205	8	6
BLCA	TCGA-XF-AAN3-01	285	3	0
BLCA	TCGA-XF-AAN4-01	36	0	0
BLCA	TCGA-XF-AAN5-01	570	13	1
BLCA	TCGA-XF-AAN7-01	278	17	0
BLCA	TCGA-XF-AAN8-01	1	0	0
BLCA	TCGA-YC-A89H-01	3575	44	15
BLCA	TCGA-YC-A8S6-01	142	4	0
BLCA	TCGA-YC-A9TC-01	254	10	2
BLCA	TCGA-YF-AA3L-01	647	49	1
BLCA	TCGA-YF-AA3M-01	312	13	1
BLCA	TCGA-ZF-A9R0-01	450	6	2
BLCA	TCGA-ZF-A9R1-01	198	14	0
BLCA	TCGA-ZF-A9R2-01	304	3	1
BLCA	TCGA-ZF-A9R3-01	182	7	0
BLCA	TCGA-ZF-A9R4-01	567	10	3
BLCA	TCGA-ZF-A9R5-01	200	14	3
BLCA	TCGA-ZF-A9R7-01	1518	4	5
BLCA	TCGA-ZF-A9R9-01	387	12	2
BLCA	TCGA-ZF-A9RC-01	1687	24	5
BLCA	TCGA-ZF-A9RD-01	367	6	1
BLCA	TCGA-ZF-A9RE-01	117	5	2
BLCA	TCGA-ZF-A9RF-01	505	13	5
BLCA	TCGA-ZF-A9RL-01	585	12	3
BLCA	TCGA-ZF-A9RM-01	178	9	1
BLCA	TCGA-ZF-A9RN-01	358	5	3
BLCA	TCGA-ZF-AA4N-01	334	9	3
BLCA	TCGA-ZF-AA4R-01	110	9	2
BLCA	TCGA-ZF-AA4T-01	150	9	0
BLCA	TCGA-ZF-AA4U-01	145	8	0
BLCA	TCGA-ZF-AA4V-01	1469	21	7
BLCA	TCGA-ZF-AA4W-01	758	187	2
BLCA	TCGA-ZF-AA4X-01	1224	6	6
BLCA	TCGA-ZF-AA51-01	1319	21	7
BLCA	TCGA-ZF-AA52-01	179	7	0
BLCA	TCGA-ZF-AA53-01	278	6	3
BLCA	TCGA-ZF-AA54-01	425	8	2
BLCA	TCGA-ZF-AA56-01	168	7	1
BLCA	TCGA-ZF-AA58-01	368	7	1
BLCA	TCGA-ZF-AA5H-01	127	3	1
BLCA	TCGA-ZF-AA5N-01	106	6	0
BLCA	TCGA-ZF-AA5P-01	48	4	0
BRCA	TCGA-3C-AAAU-01	74	8	1
BRCA	TCGA-3C-AALI-01	1195	18	3
BRCA	TCGA-3C-AALJ-01	98	9	1
BRCA	TCGA-3C-AALK-01	71	6	0
BRCA	TCGA-4H-AAAK-01	40	3	0
BRCA	TCGA-5L-AAT0-01	342	2	2
BRCA	TCGA-5L-AAT1-01	3015	14	8
BRCA	TCGA-5T-A9QA-01	93	3	0
BRCA	TCGA-A1-A0SB-01	39	3	0
BRCA	TCGA-A1-A0SD-01	60	4	0
BRCA	TCGA-A1-A0SE-01	40	2	0
BRCA	TCGA-A1-A0SF-01	67	2	0
BRCA	TCGA-A1-A0SG-01	54	2	0
BRCA	TCGA-A1-A0SH-01	236	6	0
BRCA	TCGA-A1-A0SI-01	383	2	4
BRCA	TCGA-A1-A0SJ-01	76	6	0
BRCA	TCGA-A1-A0SK-01	150	8	1
BRCA	TCGA-A1-A0SM-01	65	4	0
BRCA	TCGA-A1-A0SN-01	124	9	0
BRCA	TCGA-A1-A0SO-01	646	60	3
BRCA	TCGA-A1-A0SP-01	87	5	0
BRCA	TCGA-A2-A04N-01	88	9	2
BRCA	TCGA-A2-A04R-01	204	11	2
BRCA	TCGA-A2-A04U-01	152	9	0
BRCA	TCGA-A2-A04W-01	276	5	2
BRCA	TCGA-A2-A0CK-01	49	4	0
BRCA	TCGA-A2-A0CL-01	167	2	0
BRCA	TCGA-A2-A0CO-01	57	9	0
BRCA	TCGA-A2-A0CR-01	172	2	0
BRCA	TCGA-A2-A0CS-01	91	13	1
BRCA	TCGA-A2-A0CV-01	52	7	1
BRCA	TCGA-A2-A0CW-01	161	8	0
BRCA	TCGA-A2-A0D3-01	57	8	0
BRCA	TCGA-A2-A0EN-01	51	6	0
BRCA	TCGA-A2-A0EP-01	7	0	0
BRCA	TCGA-A2-A0ES-01	16	3	0
BRCA	TCGA-A2-A0EW-01	34	4	2
BRCA	TCGA-A2-A0ST-01	18	0	0
BRCA	TCGA-A2-A0SU-01	57	7	1
BRCA	TCGA-A2-A0SX-01	81	8	0
BRCA	TCGA-A2-A0SY-01	329	8	0
BRCA	TCGA-A2-A0T0-01	395	51	2
BRCA	TCGA-A2-A0T1-01	42	5	1
BRCA	TCGA-A2-A0T3-01	89	6	0
BRCA	TCGA-A2-A0T4-01	72	6	0
BRCA	TCGA-A2-A0T5-01	2313	6	1
BRCA	TCGA-A2-A0T6-01	409	7	0
BRCA	TCGA-A2-A0T7-01	48	3	0
BRCA	TCGA-A2-A0YC-01	66	5	1
BRCA	TCGA-A2-A0YD-01	121	6	1
BRCA	TCGA-A2-A0YE-01	93	8	0
BRCA	TCGA-A2-A0YF-01	81	9	2
BRCA	TCGA-A2-A0YG-01	138	5	1
BRCA	TCGA-A2-A0YH-01	186	5	0
BRCA	TCGA-A2-A0YI-01	38	3	0
BRCA	TCGA-A2-A0YJ-01	129	3	1
BRCA	TCGA-A2-A0YK-01	634	1	1
BRCA	TCGA-A2-A0YL-01	52	5	0
BRCA	TCGA-A2-A0YM-01	182	9	1
BRCA	TCGA-A2-A0YT-01	157	7	2
BRCA	TCGA-A2-A1FV-01	98	9	0
BRCA	TCGA-A2-A1FW-01	202	6	2
BRCA	TCGA-A2-A1FX-01	43	1	2
BRCA	TCGA-A2-A1FZ-01	36	5	0
BRCA	TCGA-A2-A1G0-01	107	4	1
BRCA	TCGA-A2-A1G1-01	63	5	2
BRCA	TCGA-A2-A1G6-01	9	2	0
BRCA	TCGA-A2-A259-01	47	6	1
BRCA	TCGA-A2-A25A-01	436	3	2
BRCA	TCGA-A2-A25B-01	203	14	1
BRCA	TCGA-A2-A25C-01	56	3	1
BRCA	TCGA-A2-A25D-01	112	11	1
BRCA	TCGA-A2-A25E-01	121	16	0
BRCA	TCGA-A2-A25F-01	135	0	0
BRCA	TCGA-A2-A3KC-01	45	8	0
BRCA	TCGA-A2-A3KD-01	40	3	0
BRCA	TCGA-A2-A3XS-01	72	13	1
BRCA	TCGA-A2-A3XT-01	220	8	1
BRCA	TCGA-A2-A3XU-01	60	6	0
BRCA	TCGA-A2-A3XV-01	104	14	0
BRCA	TCGA-A2-A3XW-01	10	2	1
BRCA	TCGA-A2-A3XX-01	81	5	1
BRCA	TCGA-A2-A3XY-01	88	13	1
BRCA	TCGA-A2-A3XZ-01	98	5	0
BRCA	TCGA-A2-A3Y0-01	419	13	3
BRCA	TCGA-A2-A4RW-01	255	13	1
BRCA	TCGA-A2-A4RX-01	55	5	0
BRCA	TCGA-A2-A4RY-01	22	4	0
BRCA	TCGA-A2-A4S0-01	37	3	0
BRCA	TCGA-A2-A4S1-01	175	10	0
BRCA	TCGA-A2-A4S2-01	68	5	1
BRCA	TCGA-A2-A4S3-01	175	8	2
BRCA	TCGA-A7-A0DA-01	348	43	2
BRCA	TCGA-A7-A0DB-01	623	2	1
BRCA	TCGA-A7-A13D-01	242	25	3
BRCA	TCGA-A7-A13E-01	60	4	1
BRCA	TCGA-A7-A13F-01	65	8	2
BRCA	TCGA-A7-A13G-01	60	5	0
BRCA	TCGA-A7-A13H-01	32	4	0
BRCA	TCGA-A7-A26E-01	130	5	1
BRCA	TCGA-A7-A26F-01	66	4	0
BRCA	TCGA-A7-A26G-01	113	6	2
BRCA	TCGA-A7-A26H-01	219	4	0
BRCA	TCGA-A7-A26I-01	57	3	0
BRCA	TCGA-A7-A26J-01	49	3	0
BRCA	TCGA-A7-A2KD-01	101	6	0
BRCA	TCGA-A7-A3IY-01	38	3	0
BRCA	TCGA-A7-A3IZ-01	168	2	1
BRCA	TCGA-A7-A3J0-01	40	3	0
BRCA	TCGA-A7-A3J1-01	39	2	0
BRCA	TCGA-A7-A3RF-01	69	6	0
BRCA	TCGA-A7-A425-01	51	4	1
BRCA	TCGA-A7-A426-01	29	0	0
BRCA	TCGA-A7-A4SA-01	166	12	1
BRCA	TCGA-A7-A4SB-01	93	9	0
BRCA	TCGA-A7-A4SC-01	69	5	0
BRCA	TCGA-A7-A4SD-01	109	11	0
BRCA	TCGA-A7-A4SE-01	229	15	2
BRCA	TCGA-A7-A4SF-01	181	20	0
BRCA	TCGA-A7-A56D-01	330	11	2
BRCA	TCGA-A7-A5ZV-01	486	30	2
BRCA	TCGA-A7-A5ZW-01	51	4	0
BRCA	TCGA-A7-A5ZX-01	51	4	0
BRCA	TCGA-A7-A6VV-01	106	5	0
BRCA	TCGA-A7-A6VW-01	164	9	2
BRCA	TCGA-A7-A6VX-01	334	24	1
BRCA	TCGA-A7-A6VY-01	269	19	0
BRCA	TCGA-A8-A075-01	189	17	1
BRCA	TCGA-AC-A23C-01	224	15	3
BRCA	TCGA-AC-A23E-01	47	6	1
BRCA	TCGA-AC-A23G-01	53	2	0
BRCA	TCGA-AC-A23H-01	12432	62	40
BRCA	TCGA-AC-A2B8-01	226	11	0
BRCA	TCGA-AC-A2BK-01	236	21	0
BRCA	TCGA-AC-A2BM-01	49	6	0
BRCA	TCGA-AC-A2FB-01	18	0	0
BRCA	TCGA-AC-A2FE-01	22	5	0
BRCA	TCGA-AC-A2FF-01	14	3	0
BRCA	TCGA-AC-A2FG-01	60	5	1
BRCA	TCGA-AC-A2FK-01	1	1	0
BRCA	TCGA-AC-A2FM-01	87	6	3
BRCA	TCGA-AC-A2FO-01	45	3	0
BRCA	TCGA-AC-A2QH-01	79	19	0
BRCA	TCGA-AC-A2QI-01	180	6	0
BRCA	TCGA-AC-A2QJ-01	4	1	0
BRCA	TCGA-AC-A3BB-01	96	3	0
BRCA	TCGA-AC-A3EH-01	84	4	0
BRCA	TCGA-AC-A3HN-01	38	5	0
BRCA	TCGA-AC-A3OD-01	57	3	1
BRCA	TCGA-AC-A3QP-01	57	4	0
BRCA	TCGA-AC-A3QQ-01	56	4	0
BRCA	TCGA-AC-A3TM-01	39	4	0
BRCA	TCGA-AC-A3TN-01	70	3	0
BRCA	TCGA-AC-A3W5-01	298	15	2
BRCA	TCGA-AC-A3W6-01	323	2	0
BRCA	TCGA-AC-A3W7-01	149	11	0
BRCA	TCGA-AC-A3YI-01	25	2	0
BRCA	TCGA-AC-A3YJ-01	74	5	0
BRCA	TCGA-AC-A4ZE-01	109	13	3
BRCA	TCGA-AC-A5EH-01	286	12	2
BRCA	TCGA-AC-A5XS-01	1111	8	5
BRCA	TCGA-AC-A5XU-01	171	9	1
BRCA	TCGA-AC-A62V-01	168	14	0
BRCA	TCGA-AC-A62X-01	152	8	0
BRCA	TCGA-AC-A62Y-01	142	9	1
BRCA	TCGA-AC-A6IV-01	36	2	1
BRCA	TCGA-AC-A6IW-01	316	9	1
BRCA	TCGA-AC-A6IX-01	103	6	0
BRCA	TCGA-AC-A6NO-01	68	8	0
BRCA	TCGA-AC-A7VB-01	87	7	1
BRCA	TCGA-AC-A7VC-01	53	3	0
BRCA	TCGA-AC-A8OP-01	373	20	2
BRCA	TCGA-AC-A8OQ-01	181	20	0
BRCA	TCGA-AC-A8OR-01	44	3	0
BRCA	TCGA-AC-A8OS-01	96	7	0
BRCA	TCGA-AN-A0XL-01	74	5	0
BRCA	TCGA-AN-A0XN-01	283	16	1
BRCA	TCGA-AN-A0XO-01	61	3	0
BRCA	TCGA-AN-A0XP-01	76	7	3
BRCA	TCGA-AN-A0XR-01	85	9	1
BRCA	TCGA-AN-A0XS-01	56	8	1
BRCA	TCGA-AN-A0XT-01	52	4	1
BRCA	TCGA-AN-A0XU-01	251	35	2
BRCA	TCGA-AN-A0XV-01	75	6	0
BRCA	TCGA-AN-A0XW-01	666	6	3
BRCA	TCGA-AO-A03M-01	1762	4	5
BRCA	TCGA-AO-A03N-01	236	3	1
BRCA	TCGA-AO-A03U-01	12	3	0
BRCA	TCGA-AO-A03V-01	143	3	2
BRCA	TCGA-AO-A0JG-01	44	1	0
BRCA	TCGA-AO-A124-01	395	45	2
BRCA	TCGA-AO-A125-01	101	2	0
BRCA	TCGA-AO-A126-01	53	0	0
BRCA	TCGA-AO-A128-01	1682	161	6
BRCA	TCGA-AO-A129-01	225	20	1
BRCA	TCGA-AO-A12A-01	43	4	1
BRCA	TCGA-AO-A12B-01	58	7	0
BRCA	TCGA-AO-A12D-01	103	5	0
BRCA	TCGA-AO-A12E-01	68	5	0
BRCA	TCGA-AO-A12F-01	79	4	0
BRCA	TCGA-AO-A12G-01	86	15	0
BRCA	TCGA-AO-A12H-01	57	3	0
BRCA	TCGA-AO-A1KO-01	1	0	0
BRCA	TCGA-AO-A1KR-01	115	5	1
BRCA	TCGA-AO-A1KT-01	101	9	0
BRCA	TCGA-AQ-A04H-01	493	12	0
BRCA	TCGA-AQ-A0Y5-01	98	1	1
BRCA	TCGA-AQ-A1H2-01	90	6	0
BRCA	TCGA-AQ-A1H3-01	55	6	0
BRCA	TCGA-AQ-A54N-01	143	11	2
BRCA	TCGA-AQ-A54O-01	35	1	0
BRCA	TCGA-AQ-A7U7-01	87	4	1
BRCA	TCGA-AR-A0TP-01	170	17	0
BRCA	TCGA-AR-A0TQ-01	97	6	1
BRCA	TCGA-AR-A0TR-01	80	10	0
BRCA	TCGA-AR-A0TS-01	140	10	1
BRCA	TCGA-AR-A0TT-01	150	6	1
BRCA	TCGA-AR-A0TU-01	217	24	1
BRCA	TCGA-AR-A0TV-01	135	8	1
BRCA	TCGA-AR-A0TW-01	111	11	1
BRCA	TCGA-AR-A0TX-01	722	7	2
BRCA	TCGA-AR-A0TZ-01	130	5	1
BRCA	TCGA-AR-A0U0-01	90	8	0
BRCA	TCGA-AR-A0U2-01	117	11	2
BRCA	TCGA-AR-A0U3-01	82	5	1
BRCA	TCGA-AR-A0U4-01	400	19	4
BRCA	TCGA-AR-A1AH-01	263	27	2
BRCA	TCGA-AR-A1AI-01	142	5	0
BRCA	TCGA-AR-A1AJ-01	82	4	0
BRCA	TCGA-AR-A1AK-01	174	6	1
BRCA	TCGA-AR-A1AL-01	54	7	0
BRCA	TCGA-AR-A1AM-01	27	1	1
BRCA	TCGA-AR-A1AN-01	73	5	0
BRCA	TCGA-AR-A1AO-01	132	8	0
BRCA	TCGA-AR-A1AP-01	131	7	1
BRCA	TCGA-AR-A1AQ-01	82	14	0
BRCA	TCGA-AR-A1AR-01	128	6	1
BRCA	TCGA-AR-A1AS-01	84	4	0
BRCA	TCGA-AR-A1AT-01	60	9	0
BRCA	TCGA-AR-A1AU-01	51	4	0
BRCA	TCGA-AR-A1AV-01	106	9	0
BRCA	TCGA-AR-A1AW-01	59	3	0
BRCA	TCGA-AR-A1AX-01	42	4	1
BRCA	TCGA-AR-A1AY-01	145	16	0
BRCA	TCGA-AR-A24H-01	282	36	2
BRCA	TCGA-AR-A24K-01	61	1	1
BRCA	TCGA-AR-A24L-01	91	9	1
BRCA	TCGA-AR-A24M-01	43	2	1
BRCA	TCGA-AR-A24N-01	80	5	0
BRCA	TCGA-AR-A24O-01	33	5	1
BRCA	TCGA-AR-A24P-01	32	4	2
BRCA	TCGA-AR-A24Q-01	361	19	3
BRCA	TCGA-AR-A24R-01	50	12	0
BRCA	TCGA-AR-A24S-01	83	4	1
BRCA	TCGA-AR-A24T-01	29	7	0
BRCA	TCGA-AR-A24U-01	76	3	0
BRCA	TCGA-AR-A24V-01	34	4	0
BRCA	TCGA-AR-A24W-01	29	1	0
BRCA	TCGA-AR-A24X-01	54	2	1
BRCA	TCGA-AR-A24Z-01	84	9	0
BRCA	TCGA-AR-A250-01	205	10	0
BRCA	TCGA-AR-A251-01	401	28	4
BRCA	TCGA-AR-A252-01	16	1	0
BRCA	TCGA-AR-A254-01	55	2	0
BRCA	TCGA-AR-A255-01	140	7	2
BRCA	TCGA-AR-A256-01	434	56	3
BRCA	TCGA-AR-A2LE-01	802	11	2
BRCA	TCGA-AR-A2LH-01	65	2	0
BRCA	TCGA-AR-A2LJ-01	25	1	0
BRCA	TCGA-AR-A2LK-01	92	3	0
BRCA	TCGA-AR-A2LL-01	59	6	1
BRCA	TCGA-AR-A2LM-01	30	4	0
BRCA	TCGA-AR-A2LN-01	85	4	0
BRCA	TCGA-AR-A2LO-01	23	3	0
BRCA	TCGA-AR-A2LQ-01	14	1	0
BRCA	TCGA-AR-A2LR-01	133	14	1
BRCA	TCGA-AR-A5QM-01	52	7	0
BRCA	TCGA-AR-A5QN-01	77	5	0
BRCA	TCGA-AR-A5QP-01	40	3	0
BRCA	TCGA-AR-A5QQ-01	104	16	1
BRCA	TCGA-B6-A0I1-01	140	14	0
BRCA	TCGA-B6-A0IH-01	60	4	0
BRCA	TCGA-B6-A0RH-01	88	9	0
BRCA	TCGA-B6-A0RL-01	128	6	0
BRCA	TCGA-B6-A0RM-01	74	8	0
BRCA	TCGA-B6-A0RN-01	67	7	1
BRCA	TCGA-B6-A0RO-01	75	8	0
BRCA	TCGA-B6-A0RP-01	72	1	0
BRCA	TCGA-B6-A0RQ-01	66	5	0
BRCA	TCGA-B6-A0RT-01	66	7	0
BRCA	TCGA-B6-A0RU-01	114	15	0
BRCA	TCGA-B6-A0RV-01	123	2	1
BRCA	TCGA-B6-A0WS-01	37	2	1
BRCA	TCGA-B6-A0WT-01	38	6	2
BRCA	TCGA-B6-A0WV-01	70	12	0
BRCA	TCGA-B6-A0WW-01	102	9	0
BRCA	TCGA-B6-A0WX-01	87	5	1
BRCA	TCGA-B6-A0WY-01	55	7	0
BRCA	TCGA-B6-A0WZ-01	143	5	0
BRCA	TCGA-B6-A0X0-01	42	4	1
BRCA	TCGA-B6-A0X1-01	203	19	0
BRCA	TCGA-B6-A0X4-01	56	2	2
BRCA	TCGA-B6-A0X5-01	111	8	1
BRCA	TCGA-B6-A0X7-01	45	6	0
BRCA	TCGA-B6-A1KN-01	112	10	0
BRCA	TCGA-B6-A2IU-01	81	3	0
BRCA	TCGA-B6-A3ZX-01	50	6	0
BRCA	TCGA-B6-A400-01	264	18	1
BRCA	TCGA-B6-A401-01	41	3	0
BRCA	TCGA-B6-A402-01	99	5	0
BRCA	TCGA-B6-A408-01	68	7	0
BRCA	TCGA-B6-A409-01	81	4	0
BRCA	TCGA-B6-A40B-01	109	6	0
BRCA	TCGA-B6-A40C-01	74	6	0
BRCA	TCGA-BH-A0AU-01	50	4	2
BRCA	TCGA-BH-A0AV-01	196	14	2
BRCA	TCGA-BH-A0AZ-01	124	16	0
BRCA	TCGA-BH-A0B0-01	171	4	0
BRCA	TCGA-BH-A0B6-01	1596	7	2
BRCA	TCGA-BH-A0B7-01	74	3	2
BRCA	TCGA-BH-A0BC-01	70	2	1
BRCA	TCGA-BH-A0BF-01	61	7	0
BRCA	TCGA-BH-A0BG-01	88	9	0
BRCA	TCGA-BH-A0BL-01	125	11	1
BRCA	TCGA-BH-A0BO-01	36	5	1
BRCA	TCGA-BH-A0BP-01	310	14	1
BRCA	TCGA-BH-A0BQ-01	44	2	0
BRCA	TCGA-BH-A0BS-01	34	5	1
BRCA	TCGA-BH-A0BT-01	67	3	0
BRCA	TCGA-BH-A0BW-01	223	42	1
BRCA	TCGA-BH-A0BZ-01	516	88	3
BRCA	TCGA-BH-A0C1-01	85	8	0
BRCA	TCGA-BH-A0C3-01	39	6	1
BRCA	TCGA-BH-A0C7-01	98	8	0
BRCA	TCGA-BH-A0DD-01	76	5	0
BRCA	TCGA-BH-A0DE-01	62	9	0
BRCA	TCGA-BH-A0DG-01	82	6	0
BRCA	TCGA-BH-A0DH-01	97	9	0
BRCA	TCGA-BH-A0DI-01	97	6	0
BRCA	TCGA-BH-A0DL-01	112	4	1
BRCA	TCGA-BH-A0DO-01	55	6	0
BRCA	TCGA-BH-A0DQ-01	55	6	0
BRCA	TCGA-BH-A0DT-01	25	6	1
BRCA	TCGA-BH-A0DV-01	20	5	0
BRCA	TCGA-BH-A0DX-01	134	5	0
BRCA	TCGA-BH-A0E9-01	43	9	0
BRCA	TCGA-BH-A0EA-01	53	3	1
BRCA	TCGA-BH-A0EI-01	64	3	1
BRCA	TCGA-BH-A0H3-01	36	5	1
BRCA	TCGA-BH-A0H5-01	139	1	0
BRCA	TCGA-BH-A0HA-01	667	418	2
BRCA	TCGA-BH-A0HI-01	67	8	0
BRCA	TCGA-BH-A0HN-01	68	4	0
BRCA	TCGA-BH-A0HP-01	668	8	7
BRCA	TCGA-BH-A0RX-01	49	7	0
BRCA	TCGA-BH-A0W4-01	55	6	0
BRCA	TCGA-BH-A0W5-01	36	2	0
BRCA	TCGA-BH-A0W7-01	392	1	0
BRCA	TCGA-BH-A0WA-01	228	14	5
BRCA	TCGA-BH-A18F-01	120	7	1
BRCA	TCGA-BH-A18G-01	3204	1704	12
BRCA	TCGA-BH-A18H-01	89	4	0
BRCA	TCGA-BH-A18I-01	51	12	0
BRCA	TCGA-BH-A18J-01	234	4	1
BRCA	TCGA-BH-A18K-01	124	9	1
BRCA	TCGA-BH-A18L-01	133	10	0
BRCA	TCGA-BH-A18M-01	34	3	1
BRCA	TCGA-BH-A18N-01	82	5	0
BRCA	TCGA-BH-A18P-01	833	13	1
BRCA	TCGA-BH-A18Q-01	253	21	1
BRCA	TCGA-BH-A18R-01	80	6	0
BRCA	TCGA-BH-A18S-01	62	5	0
BRCA	TCGA-BH-A18T-01	185	10	1
BRCA	TCGA-BH-A18U-01	246	11	1
BRCA	TCGA-BH-A18V-01	552	30	3
BRCA	TCGA-BH-A1EO-01	83	4	0
BRCA	TCGA-BH-A1ES-01	49	7	0
BRCA	TCGA-BH-A1ET-01	68	2	1
BRCA	TCGA-BH-A1EU-01	44	5	0
BRCA	TCGA-BH-A1EV-01	249	9	1
BRCA	TCGA-BH-A1EW-01	32	0	0
BRCA	TCGA-BH-A1EX-01	69	6	0
BRCA	TCGA-BH-A1EY-01	112	4	2
BRCA	TCGA-BH-A1F0-01	126	3	0
BRCA	TCGA-BH-A1F2-01	128	6	0
BRCA	TCGA-BH-A1F5-01	71	6	0
BRCA	TCGA-BH-A1F6-01	66	11	0
BRCA	TCGA-BH-A1F8-01	392	10	1
BRCA	TCGA-BH-A1FC-01	254	14	4
BRCA	TCGA-BH-A1FE-01	25	1	0
BRCA	TCGA-BH-A1FG-01	53	9	1
BRCA	TCGA-BH-A1FH-01	40	5	0
BRCA	TCGA-BH-A1FJ-01	84	10	0
BRCA	TCGA-BH-A1FL-01	70	10	0
BRCA	TCGA-BH-A1FM-01	135	10	0
BRCA	TCGA-BH-A1FN-01	345	31	2
BRCA	TCGA-BH-A1FR-01	54	0	0
BRCA	TCGA-BH-A1FU-01	107	8	0
BRCA	TCGA-BH-A201-01	69	4	1
BRCA	TCGA-BH-A202-01	78	5	1
BRCA	TCGA-BH-A203-01	159	10	2
BRCA	TCGA-BH-A204-01	100	5	1
BRCA	TCGA-BH-A208-01	136	3	0
BRCA	TCGA-BH-A209-01	175	5	1
BRCA	TCGA-BH-A28O-01	26	1	0
BRCA	TCGA-BH-A28Q-01	37	2	1
BRCA	TCGA-BH-A2L8-01	925	1	3
BRCA	TCGA-BH-A42T-01	85	4	1
BRCA	TCGA-BH-A42U-01	15	0	0
BRCA	TCGA-BH-A42V-01	54	4	0
BRCA	TCGA-BH-A5IZ-01	176	14	0
BRCA	TCGA-BH-A5J0-01	132	4	0
BRCA	TCGA-BH-A6R8-01	77	2	0
BRCA	TCGA-BH-A6R9-01	18	1	0
BRCA	TCGA-BH-A8FY-01	101	7	0
BRCA	TCGA-BH-A8FZ-01	118	4	0
BRCA	TCGA-BH-A8G0-01	21	0	0
BRCA	TCGA-BH-AB28-01	54	6	0
BRCA	TCGA-C8-A12K-01	312	11	3
BRCA	TCGA-C8-A12L-01	203	21	0
BRCA	TCGA-C8-A12M-01	142	19	1
BRCA	TCGA-C8-A12N-01	50	5	1
BRCA	TCGA-C8-A12O-01	69	5	0
BRCA	TCGA-C8-A12P-01	403	14	2
BRCA	TCGA-C8-A12Q-01	300	15	3
BRCA	TCGA-C8-A12T-01	356	5	2
BRCA	TCGA-C8-A12U-01	136	13	0
BRCA	TCGA-C8-A12V-01	96	3	1
BRCA	TCGA-C8-A12W-01	116	5	1
BRCA	TCGA-C8-A12X-01	111	4	0
BRCA	TCGA-C8-A12Y-01	80	8	0
BRCA	TCGA-C8-A12Z-01	95	4	0
BRCA	TCGA-C8-A130-01	100	9	1
BRCA	TCGA-C8-A131-01	134	17	0
BRCA	TCGA-C8-A132-01	150	4	1
BRCA	TCGA-C8-A133-01	63	8	0
BRCA	TCGA-C8-A134-01	200	17	1
BRCA	TCGA-C8-A135-01	140	14	0
BRCA	TCGA-C8-A137-01	153	5	3
BRCA	TCGA-C8-A138-01	91	11	0
BRCA	TCGA-C8-A1HE-01	100	4	1
BRCA	TCGA-C8-A1HF-01	99	4	0
BRCA	TCGA-C8-A1HG-01	117	10	0
BRCA	TCGA-C8-A1HI-01	100	3	0
BRCA	TCGA-C8-A1HJ-01	251	22	0
BRCA	TCGA-C8-A1HK-01	109	14	0
BRCA	TCGA-C8-A1HL-01	72	3	0
BRCA	TCGA-C8-A1HM-01	850	8	5
BRCA	TCGA-C8-A1HN-01	117	8	0
BRCA	TCGA-C8-A1HO-01	93	5	1
BRCA	TCGA-C8-A26V-01	161	3	1
BRCA	TCGA-C8-A26W-01	111	2	0
BRCA	TCGA-C8-A26X-01	128	17	1
BRCA	TCGA-C8-A26Y-01	1701	54	10
BRCA	TCGA-C8-A26Z-01	102	8	0
BRCA	TCGA-C8-A273-01	59	3	0
BRCA	TCGA-C8-A274-01	459	20	2
BRCA	TCGA-C8-A275-01	224	7	1
BRCA	TCGA-C8-A278-01	73	3	0
BRCA	TCGA-C8-A27A-01	61	3	0
BRCA	TCGA-C8-A27B-01	315	18	1
BRCA	TCGA-C8-A3M7-01	250	7	1
BRCA	TCGA-C8-A3M8-01	94	15	1
BRCA	TCGA-C8-A8HP-01	269	5	1
BRCA	TCGA-C8-A8HQ-01	624	13	2
BRCA	TCGA-C8-A8HR-01	58	5	0
BRCA	TCGA-D8-A13Y-01	185	20	0
BRCA	TCGA-D8-A13Z-01	179	11	2
BRCA	TCGA-D8-A140-01	291	29	2
BRCA	TCGA-D8-A141-01	25	3	1
BRCA	TCGA-D8-A142-01	220	16	0
BRCA	TCGA-D8-A143-01	105	10	0
BRCA	TCGA-D8-A145-01	79	9	0
BRCA	TCGA-D8-A146-01	84	7	0
BRCA	TCGA-D8-A147-01	372	27	2
BRCA	TCGA-D8-A1J8-01	1978	405	12
BRCA	TCGA-D8-A1J9-01	490	4	1
BRCA	TCGA-D8-A1JB-01	87	5	1
BRCA	TCGA-D8-A1JC-01	244	12	1
BRCA	TCGA-D8-A1JD-01	218	16	0
BRCA	TCGA-D8-A1JE-01	49	3	1
BRCA	TCGA-D8-A1JF-01	101	12	1
BRCA	TCGA-D8-A1JG-01	295	13	1
BRCA	TCGA-D8-A1JH-01	35	4	0
BRCA	TCGA-D8-A1JI-01	79	7	1
BRCA	TCGA-D8-A1JJ-01	164	6	0
BRCA	TCGA-D8-A1JK-01	421	58	2
BRCA	TCGA-D8-A1JL-01	280	16	3
BRCA	TCGA-D8-A1JM-01	123	11	0
BRCA	TCGA-D8-A1JN-01	480	15	3
BRCA	TCGA-D8-A1JP-01	269	27	0
BRCA	TCGA-D8-A1JS-01	53	7	0
BRCA	TCGA-D8-A1JT-01	74	9	1
BRCA	TCGA-D8-A1JU-01	29	2	0
BRCA	TCGA-D8-A1X5-01	97	12	0
BRCA	TCGA-D8-A1X6-01	73	11	1
BRCA	TCGA-D8-A1X7-01	62	3	0
BRCA	TCGA-D8-A1X9-01	181	14	3
BRCA	TCGA-D8-A1XA-01	54	8	0
BRCA	TCGA-D8-A1XB-01	64	3	1
BRCA	TCGA-D8-A1XC-01	65	2	1
BRCA	TCGA-D8-A1XF-01	99	10	0
BRCA	TCGA-D8-A1XG-01	64	12	0
BRCA	TCGA-D8-A1XK-01	2770	779	39
BRCA	TCGA-D8-A1XL-01	181	22	0
BRCA	TCGA-D8-A1XM-01	110	7	1
BRCA	TCGA-D8-A1XO-01	52	2	0
BRCA	TCGA-D8-A1XQ-01	1818	725	9
BRCA	TCGA-D8-A1XR-01	70	4	0
BRCA	TCGA-D8-A1XS-01	41	5	0
BRCA	TCGA-D8-A1XT-01	77	5	0
BRCA	TCGA-D8-A1XU-01	72	7	1
BRCA	TCGA-D8-A1XV-01	83	5	0
BRCA	TCGA-D8-A1XW-01	237	16	2
BRCA	TCGA-D8-A1XY-01	91	7	0
BRCA	TCGA-D8-A1XZ-01	125	15	0
BRCA	TCGA-D8-A1Y0-01	124	7	0
BRCA	TCGA-D8-A1Y1-01	391	239	1
BRCA	TCGA-D8-A1Y2-01	36	2	0
BRCA	TCGA-D8-A1Y3-01	137	6	1
BRCA	TCGA-D8-A27E-01	23	4	0
BRCA	TCGA-D8-A27F-01	176	15	0
BRCA	TCGA-D8-A27G-01	2098	10	3
BRCA	TCGA-D8-A27H-01	276	24	0
BRCA	TCGA-D8-A27I-01	45	3	0
BRCA	TCGA-D8-A27K-01	41	6	2
BRCA	TCGA-D8-A27L-01	74	5	1
BRCA	TCGA-D8-A27M-01	126	8	1
BRCA	TCGA-D8-A27N-01	96	8	2
BRCA	TCGA-D8-A27P-01	50	7	1
BRCA	TCGA-D8-A27R-01	53	2	1
BRCA	TCGA-D8-A27T-01	63	2	0
BRCA	TCGA-D8-A27V-01	495	2889	1
BRCA	TCGA-D8-A27W-01	67	6	0
BRCA	TCGA-D8-A3Z5-01	24	3	0
BRCA	TCGA-D8-A3Z6-01	40	5	0
BRCA	TCGA-D8-A4Z1-01	29	0	0
BRCA	TCGA-D8-A73U-01	159	7	0
BRCA	TCGA-D8-A73W-01	71	5	0
BRCA	TCGA-D8-A73X-01	62	4	1
BRCA	TCGA-E2-A105-01	130	12	2
BRCA	TCGA-E2-A107-01	75	12	1
BRCA	TCGA-E2-A108-01	238	6	1
BRCA	TCGA-E2-A109-01	128	9	1
BRCA	TCGA-E2-A10A-01	59	5	0
BRCA	TCGA-E2-A10B-01	100	3	2
BRCA	TCGA-E2-A10C-01	869	4	4
BRCA	TCGA-E2-A10F-01	50	2	0
BRCA	TCGA-E2-A14N-01	166	7	0
BRCA	TCGA-E2-A14O-01	66	6	0
BRCA	TCGA-E2-A14P-01	202	17	1
BRCA	TCGA-E2-A14Q-01	59	4	1
BRCA	TCGA-E2-A14R-01	322	26	2
BRCA	TCGA-E2-A14S-01	130	3	0
BRCA	TCGA-E2-A14T-01	85	10	1
BRCA	TCGA-E2-A14U-01	11	1	0
BRCA	TCGA-E2-A14V-01	206	19	0
BRCA	TCGA-E2-A14W-01	214	43	1
BRCA	TCGA-E2-A14X-01	67	5	0
BRCA	TCGA-E2-A14Y-01	78	6	0
BRCA	TCGA-E2-A14Z-01	180	6	0
BRCA	TCGA-E2-A150-01	148	7	2
BRCA	TCGA-E2-A152-01	340	4	3
BRCA	TCGA-E2-A153-01	45	5	0
BRCA	TCGA-E2-A154-01	85	6	0
BRCA	TCGA-E2-A155-01	181	12	3
BRCA	TCGA-E2-A156-01	52	8	0
BRCA	TCGA-E2-A158-01	210	11	1
BRCA	TCGA-E2-A159-01	378	3	2
BRCA	TCGA-E2-A15A-01	111	9	1
BRCA	TCGA-E2-A15C-01	63	2	2
BRCA	TCGA-E2-A15D-01	57	9	0
BRCA	TCGA-E2-A15E-01	59	6	0
BRCA	TCGA-E2-A15F-01	59	4	0
BRCA	TCGA-E2-A15G-01	117	13	0
BRCA	TCGA-E2-A15H-01	59	5	0
BRCA	TCGA-E2-A15I-01	74	8	1
BRCA	TCGA-E2-A15J-01	58	7	2
BRCA	TCGA-E2-A15K-01	103	4	1
BRCA	TCGA-E2-A15L-01	58	7	1
BRCA	TCGA-E2-A15M-01	175	9	4
BRCA	TCGA-E2-A15O-01	92	8	1
BRCA	TCGA-E2-A15P-01	53	49	1
BRCA	TCGA-E2-A15R-01	103	10	0
BRCA	TCGA-E2-A15S-01	145	12	1
BRCA	TCGA-E2-A15T-01	60	3	0
BRCA	TCGA-E2-A1AZ-01	118	5	1
BRCA	TCGA-E2-A1B0-01	103	8	0
BRCA	TCGA-E2-A1B1-01	76	2	1
BRCA	TCGA-E2-A1B4-01	77	4	0
BRCA	TCGA-E2-A1B5-01	63	6	0
BRCA	TCGA-E2-A1B6-01	62	2	0
BRCA	TCGA-E2-A1BC-01	84	6	1
BRCA	TCGA-E2-A1BD-01	66	8	0
BRCA	TCGA-E2-A1IE-01	70	3	0
BRCA	TCGA-E2-A1IF-01	25	4	0
BRCA	TCGA-E2-A1IG-01	126	10	1
BRCA	TCGA-E2-A1IH-01	148	8	0
BRCA	TCGA-E2-A1II-01	57	4	2
BRCA	TCGA-E2-A1IJ-01	29	8	0
BRCA	TCGA-E2-A1IK-01	28	3	0
BRCA	TCGA-E2-A1IL-01	54	6	0
BRCA	TCGA-E2-A1IN-01	462	7	2
BRCA	TCGA-E2-A1IO-01	23	3	0
BRCA	TCGA-E2-A1IU-01	47	2	0
BRCA	TCGA-E2-A1L6-01	40	2	1
BRCA	TCGA-E2-A1L7-01	127	7	0
BRCA	TCGA-E2-A1L8-01	75	1	1
BRCA	TCGA-E2-A1L9-01	51	8	0
BRCA	TCGA-E2-A1LA-01	169	16	0
BRCA	TCGA-E2-A1LB-01	90	5	0
BRCA	TCGA-E2-A1LE-01	151	8	1
BRCA	TCGA-E2-A1LG-01	366	9	4
BRCA	TCGA-E2-A1LH-01	358	29	0
BRCA	TCGA-E2-A1LI-01	63	4	0
BRCA	TCGA-E2-A1LK-01	121	19	1
BRCA	TCGA-E2-A1LL-01	123	7	0
BRCA	TCGA-E2-A2P5-01	162	7	4
BRCA	TCGA-E2-A2P6-01	295	11	1
BRCA	TCGA-E2-A3DX-01	12	3	0
BRCA	TCGA-E2-A56Z-01	86	5	1
BRCA	TCGA-E2-A570-01	49	8	0
BRCA	TCGA-E2-A572-01	53	2	0
BRCA	TCGA-E2-A573-01	115	5	1
BRCA	TCGA-E2-A574-01	245	7	0
BRCA	TCGA-E2-A576-01	101	13	0
BRCA	TCGA-E2-A9RU-01	129	5	0
BRCA	TCGA-E9-A1N3-01	51	2	0
BRCA	TCGA-E9-A1N4-01	63	0	0
BRCA	TCGA-E9-A1N5-01	67	3	0
BRCA	TCGA-E9-A1N8-01	75	6	1
BRCA	TCGA-E9-A1N9-01	64	3	1
BRCA	TCGA-E9-A1NA-01	189	17	0
BRCA	TCGA-E9-A1NE-01	85	3	1
BRCA	TCGA-E9-A1NF-01	120	9	0
BRCA	TCGA-E9-A1NG-01	57	0	0
BRCA	TCGA-E9-A1NH-01	63	8	1
BRCA	TCGA-E9-A1QZ-01	23	1	0
BRCA	TCGA-E9-A1R0-01	54	3	0
BRCA	TCGA-E9-A1R2-01	109	16	0
BRCA	TCGA-E9-A1R3-01	44	3	0
BRCA	TCGA-E9-A1R4-01	221	7	1
BRCA	TCGA-E9-A1R5-01	81	9	1
BRCA	TCGA-E9-A1R6-01	57	6	0
BRCA	TCGA-E9-A1R7-01	96	4	2
BRCA	TCGA-E9-A1RA-01	47	4	0
BRCA	TCGA-E9-A1RB-01	65	6	0
BRCA	TCGA-E9-A1RC-01	101	8	2
BRCA	TCGA-E9-A1RD-01	40	3	1
BRCA	TCGA-E9-A1RE-01	108	5	0
BRCA	TCGA-E9-A1RF-01	250	9	3
BRCA	TCGA-E9-A1RG-01	72	3	0
BRCA	TCGA-E9-A1RH-01	174	9	0
BRCA	TCGA-E9-A1RI-01	37	4	1
BRCA	TCGA-E9-A226-01	84	6	0
BRCA	TCGA-E9-A227-01	47	6	0
BRCA	TCGA-E9-A228-01	87	3	0
BRCA	TCGA-E9-A229-01	47	5	1
BRCA	TCGA-E9-A22A-01	52	2	0
BRCA	TCGA-E9-A22B-01	147	6	0
BRCA	TCGA-E9-A22D-01	45	5	0
BRCA	TCGA-E9-A22E-01	179	10	2
BRCA	TCGA-E9-A22G-01	231	19	1
BRCA	TCGA-E9-A22H-01	28	4	0
BRCA	TCGA-E9-A243-01	112	6	0
BRCA	TCGA-E9-A244-01	206	16	0
BRCA	TCGA-E9-A245-01	34	2	1
BRCA	TCGA-E9-A247-01	71	6	1
BRCA	TCGA-E9-A248-01	30	5	1
BRCA	TCGA-E9-A249-01	40	6	1
BRCA	TCGA-E9-A24A-01	42	7	1
BRCA	TCGA-E9-A295-01	189	8	1
BRCA	TCGA-E9-A2JS-01	151	8	1
BRCA	TCGA-E9-A2JT-01	11	0	0
BRCA	TCGA-E9-A3HO-01	132	19	2
BRCA	TCGA-E9-A3Q9-01	78	7	0
BRCA	TCGA-E9-A3QA-01	65	0	0
BRCA	TCGA-E9-A3X8-01	44	3	0
BRCA	TCGA-E9-A54X-01	52	7	2
BRCA	TCGA-E9-A54Y-01	94	6	0
BRCA	TCGA-E9-A5FK-01	32	3	0
BRCA	TCGA-E9-A5FL-01	219	13	2
BRCA	TCGA-E9-A5UO-01	69	9	0
BRCA	TCGA-E9-A5UP-01	72	8	0
BRCA	TCGA-E9-A6HE-01	48	7	0
BRCA	TCGA-EW-A1IW-01	191	8	0
BRCA	TCGA-EW-A1IX-01	45	0	0
BRCA	TCGA-EW-A1IY-01	71	2	0
BRCA	TCGA-EW-A1IZ-01	517	288	4
BRCA	TCGA-EW-A1J1-01	49	5	0
BRCA	TCGA-EW-A1J3-01	67	1	1
BRCA	TCGA-EW-A1J5-01	993	4	4
BRCA	TCGA-EW-A1J6-01	88	10	0
BRCA	TCGA-EW-A1OV-01	187	7	0
BRCA	TCGA-EW-A1OX-01	56	4	0
BRCA	TCGA-EW-A1OZ-01	121	9	1
BRCA	TCGA-EW-A1P0-01	47	3	0
BRCA	TCGA-EW-A1P1-01	6	1	0
BRCA	TCGA-EW-A1P3-01	39	4	0
BRCA	TCGA-EW-A1P4-01	134	8	1
BRCA	TCGA-EW-A1P5-01	32	4	1
BRCA	TCGA-EW-A1P6-01	50	3	0
BRCA	TCGA-EW-A1P7-01	26	3	1
BRCA	TCGA-EW-A1P8-01	68	10	0
BRCA	TCGA-EW-A1PA-01	62	7	0
BRCA	TCGA-EW-A1PB-01	313	13	2
BRCA	TCGA-EW-A1PC-01	230	9	2
BRCA	TCGA-EW-A1PD-01	153	11	0
BRCA	TCGA-EW-A1PE-01	51	3	0
BRCA	TCGA-EW-A1PG-01	12	3	0
BRCA	TCGA-EW-A1PH-01	115	6	0
BRCA	TCGA-EW-A2FR-01	66	0	0
BRCA	TCGA-EW-A2FS-01	51	7	0
BRCA	TCGA-EW-A2FV-01	57	3201	0
BRCA	TCGA-EW-A2FW-01	51	2	0
BRCA	TCGA-EW-A3E8-01	147	2	0
BRCA	TCGA-EW-A3U0-01	214	10	0
BRCA	TCGA-EW-A423-01	159	10	0
BRCA	TCGA-EW-A6S9-01	48	3	0
BRCA	TCGA-EW-A6SA-01	178	4	1
BRCA	TCGA-EW-A6SB-01	100	4	0
BRCA	TCGA-EW-A6SC-01	55	4	0
BRCA	TCGA-EW-A6SD-01	132	8	0
BRCA	TCGA-GI-A2C8-01	215	5	0
BRCA	TCGA-GI-A2C9-01	249	21	1
BRCA	TCGA-GM-A2D9-01	943	9	2
BRCA	TCGA-GM-A2DA-01	65	4	0
BRCA	TCGA-GM-A2DB-01	176	46	3
BRCA	TCGA-GM-A2DC-01	53	8	0
BRCA	TCGA-GM-A2DD-01	96	6	1
BRCA	TCGA-GM-A2DF-01	66	4	1
BRCA	TCGA-GM-A2DH-01	308	26	3
BRCA	TCGA-GM-A2DI-01	82	3	0
BRCA	TCGA-GM-A2DK-01	61	2	0
BRCA	TCGA-GM-A2DL-01	78	9	0
BRCA	TCGA-GM-A2DM-01	40	5	0
BRCA	TCGA-GM-A2DN-01	22	3	1
BRCA	TCGA-GM-A2DO-01	201	0	0
BRCA	TCGA-GM-A3NW-01	149	6	1
BRCA	TCGA-GM-A3NY-01	115	11	2
BRCA	TCGA-GM-A3XG-01	7	1	0
BRCA	TCGA-GM-A3XL-01	244	14	1
BRCA	TCGA-GM-A3XN-01	38	1	0
BRCA	TCGA-GM-A4E0-01	53	3	0
BRCA	TCGA-GM-A5PV-01	48	2	0
BRCA	TCGA-GM-A5PX-01	65	3	1
BRCA	TCGA-HN-A2NL-01	181	17	3
BRCA	TCGA-HN-A2OB-01	25	2	0
BRCA	TCGA-JL-A3YW-01	214	62	2
BRCA	TCGA-JL-A3YX-01	100	8	0
BRCA	TCGA-LD-A66U-01	37	2	0
BRCA	TCGA-LD-A74U-01	526	5	2
BRCA	TCGA-LD-A7W5-01	83	5	0
BRCA	TCGA-LD-A7W6-01	69	8	3
BRCA	TCGA-LD-A9QF-01	21	2	1
BRCA	TCGA-LL-A440-01	7	0	0
BRCA	TCGA-LL-A441-01	71	6	0
BRCA	TCGA-LL-A50Y-01	68	8	0
BRCA	TCGA-LL-A5YL-01	162	4	0
BRCA	TCGA-LL-A5YM-01	84	8	0
BRCA	TCGA-LL-A5YN-01	50	2	0
BRCA	TCGA-LL-A5YO-01	63	3	0
BRCA	TCGA-LL-A5YP-01	165	3	0
BRCA	TCGA-LL-A6FP-01	145	16	0
BRCA	TCGA-LL-A6FQ-01	104	9	1
BRCA	TCGA-LL-A6FR-01	97	8	1
BRCA	TCGA-LL-A73Y-01	359	9	4
BRCA	TCGA-LL-A73Z-01	44	9	0
BRCA	TCGA-LL-A740-01	108	19	0
BRCA	TCGA-LL-A7SZ-01	102	2	0
BRCA	TCGA-LL-A7T0-01	127	8	0
BRCA	TCGA-LL-A8F5-01	364	28	0
BRCA	TCGA-LL-A9Q3-01	86	14	0
BRCA	TCGA-LQ-A4E4-01	262	6	0
BRCA	TCGA-MS-A51U-01	28	2	0
BRCA	TCGA-OK-A5Q2-01	50	3	1
BRCA	TCGA-OL-A5D6-01	86	7	0
BRCA	TCGA-OL-A5D7-01	115	8	3
BRCA	TCGA-OL-A5D8-01	65	13	0
BRCA	TCGA-OL-A5DA-01	126	4	0
BRCA	TCGA-OL-A5RU-01	56	6	1
BRCA	TCGA-OL-A5RV-01	32	1	1
BRCA	TCGA-OL-A5RW-01	452	17	1
BRCA	TCGA-OL-A5RX-01	50	7	0
BRCA	TCGA-OL-A5RY-01	9	1	0
BRCA	TCGA-OL-A5RZ-01	243	16	0
BRCA	TCGA-OL-A5S0-01	61	9	0
BRCA	TCGA-OL-A66H-01	39	5	0
BRCA	TCGA-OL-A66I-01	83	6	1
BRCA	TCGA-OL-A66J-01	118	8	1
BRCA	TCGA-OL-A66K-01	86	6	1
BRCA	TCGA-OL-A66L-01	151	4	1
BRCA	TCGA-OL-A66N-01	67	4	0
BRCA	TCGA-OL-A66O-01	62	6	0
BRCA	TCGA-OL-A66P-01	134	21	0
BRCA	TCGA-OL-A6VO-01	62	4	0
BRCA	TCGA-OL-A6VQ-01	83	5	0
BRCA	TCGA-OL-A6VR-01	23	2	0
BRCA	TCGA-OL-A97C-01	111	47	1
BRCA	TCGA-PE-A5DC-01	294	32	2
BRCA	TCGA-PE-A5DD-01	165	5	0
BRCA	TCGA-PE-A5DE-01	887	4	1
BRCA	TCGA-PL-A8LV-01	247	10	2
BRCA	TCGA-PL-A8LX-01	60	6	0
BRCA	TCGA-PL-A8LY-01	9	1	0
BRCA	TCGA-PL-A8LZ-01	170	2	1
BRCA	TCGA-S3-A6ZF-01	79	5	0
BRCA	TCGA-S3-A6ZG-01	90	9	0
BRCA	TCGA-S3-A6ZH-01	77	5	0
BRCA	TCGA-S3-AA0Z-01	153	11	0
BRCA	TCGA-S3-AA10-01	271	29	2
BRCA	TCGA-S3-AA11-01	181	20	0
BRCA	TCGA-S3-AA12-01	94	12	1
BRCA	TCGA-S3-AA14-01	35	4	1
BRCA	TCGA-S3-AA15-01	28	0	0
BRCA	TCGA-S3-AA17-01	218	18	0
BRCA	TCGA-UL-AAZ6-01	216	12	1
BRCA	TCGA-UU-A93S-01	376	23	0
BRCA	TCGA-V7-A7HQ-01	57	4	0
BRCA	TCGA-W8-A86G-01	55	3	0
BRCA	TCGA-WT-AB41-01	100	3	0
BRCA	TCGA-WT-AB44-01	86	16	0
BRCA	TCGA-XX-A899-01	57	4	0
BRCA	TCGA-XX-A89A-01	448	3	1
BRCA	TCGA-Z7-A8R5-01	27	2	0
BRCA	TCGA-Z7-A8R6-01	195	8	5
CESC	TCGA-2W-A8YY-01	36012	1963	142
CESC	TCGA-4J-AA1J-01	438	10	1
CESC	TCGA-BI-A0VR-01	203	5	0
CESC	TCGA-BI-A0VS-01	220	7	1
CESC	TCGA-BI-A20A-01	91	3	0
CESC	TCGA-C5-A0TN-01	49	1	0
CESC	TCGA-C5-A1BE-01	137	12	0
CESC	TCGA-C5-A1BF-01	145	6	1
CESC	TCGA-C5-A1BI-01	196	3	0
CESC	TCGA-C5-A1BJ-01	203	5	0
CESC	TCGA-C5-A1BK-01	361	4	1
CESC	TCGA-C5-A1BL-01	402	6	1
CESC	TCGA-C5-A1BM-01	266	3	2
CESC	TCGA-C5-A1BN-01	131	6	2
CESC	TCGA-C5-A1BQ-01	2810	15	10
CESC	TCGA-C5-A1M5-01	125	5	1
CESC	TCGA-C5-A1M6-01	324	6	2
CESC	TCGA-C5-A1M7-01	179	3	0
CESC	TCGA-C5-A1M8-01	131	4	1
CESC	TCGA-C5-A1M9-01	119	8	0
CESC	TCGA-C5-A1ME-01	84	2	0
CESC	TCGA-C5-A1MF-01	196	8	0
CESC	TCGA-C5-A1MH-01	533	6	2
CESC	TCGA-C5-A1MI-01	111	2	0
CESC	TCGA-C5-A1MJ-01	173	4	0
CESC	TCGA-C5-A1MK-01	615	6	0
CESC	TCGA-C5-A1ML-01	165	3	0
CESC	TCGA-C5-A1MN-01	317	5	3
CESC	TCGA-C5-A1MP-01	84	1	1
CESC	TCGA-C5-A1MQ-01	77	6	0
CESC	TCGA-C5-A2LS-01	156	7	1
CESC	TCGA-C5-A2LT-01	83	4	0
CESC	TCGA-C5-A2LV-01	213	7	0
CESC	TCGA-C5-A2LX-01	501	13	1
CESC	TCGA-C5-A2LY-01	260	8	0
CESC	TCGA-C5-A2LZ-01	1341	24	2
CESC	TCGA-C5-A2M1-01	257	17	3
CESC	TCGA-C5-A2M2-01	171	8	0
CESC	TCGA-C5-A3HD-01	478	12	4
CESC	TCGA-C5-A3HE-01	906	11	1
CESC	TCGA-C5-A3HF-01	84	2	1
CESC	TCGA-C5-A3HL-01	357	14	1
CESC	TCGA-C5-A7CG-01	93	12	1
CESC	TCGA-C5-A7CH-01	189	11	1
CESC	TCGA-C5-A7CJ-01	165	3	2
CESC	TCGA-C5-A7CK-01	377	12	4
CESC	TCGA-C5-A7CL-01	294	12	0
CESC	TCGA-C5-A7CM-01	65	6	0
CESC	TCGA-C5-A7CO-01	280	17	1
CESC	TCGA-C5-A7UC-01	204	5	0
CESC	TCGA-C5-A7UE-01	309	14	0
CESC	TCGA-C5-A7UH-01	659	13	1
CESC	TCGA-C5-A7UI-01	301	10	0
CESC	TCGA-C5-A7X3-01	142	7	0
CESC	TCGA-C5-A7X5-01	764	11	2
CESC	TCGA-C5-A7X8-01	225	6	1
CESC	TCGA-C5-A7XC-01	126	4	1
CESC	TCGA-C5-A8XH-01	622	36	2
CESC	TCGA-C5-A8XI-01	109	10	0
CESC	TCGA-C5-A8XJ-01	1024	16	2
CESC	TCGA-C5-A8XK-01	696	15	1
CESC	TCGA-C5-A8YQ-01	456	26	0
CESC	TCGA-C5-A8YR-01	366	11	3
CESC	TCGA-C5-A8YT-01	0	0	0
CESC	TCGA-C5-A8ZZ-01	233	9	0
CESC	TCGA-C5-A901-01	262	4	2
CESC	TCGA-C5-A902-01	951	17	3
CESC	TCGA-C5-A905-01	237	7	2
CESC	TCGA-C5-A907-01	135	9	0
CESC	TCGA-DG-A2KH-01	159	7	0
CESC	TCGA-DG-A2KJ-01	242	14	0
CESC	TCGA-DG-A2KK-01	1051	13	10
CESC	TCGA-DG-A2KL-01	425	7	4
CESC	TCGA-DG-A2KM-01	286	3	2
CESC	TCGA-DR-A0ZL-01	111	3	1
CESC	TCGA-DR-A0ZM-01	2775	16	10
CESC	TCGA-DS-A0VK-01	282	10	3
CESC	TCGA-DS-A0VL-01	128	4	1
CESC	TCGA-DS-A0VM-01	707	7	2
CESC	TCGA-DS-A0VN-01	322	7	1
CESC	TCGA-DS-A1OA-01	302	6	1
CESC	TCGA-DS-A1OB-01	1782	27	6
CESC	TCGA-DS-A1OC-01	1129	19	0
CESC	TCGA-DS-A1OD-01	1086	28	0
CESC	TCGA-DS-A3LQ-01	113	7	0
CESC	TCGA-DS-A5RQ-01	319	9	3
CESC	TCGA-DS-A7WF-01	101	7	2
CESC	TCGA-DS-A7WH-01	271	13	3
CESC	TCGA-DS-A7WI-01	109	8	0
CESC	TCGA-EA-A1QS-01	117	4	0
CESC	TCGA-EA-A1QT-01	159	8	2
CESC	TCGA-EA-A3HQ-01	280	15	1
CESC	TCGA-EA-A3HR-01	210	8	1
CESC	TCGA-EA-A3HS-01	1872	337	8
CESC	TCGA-EA-A3HT-01	265	8	2
CESC	TCGA-EA-A3HU-01	2681	434	11
CESC	TCGA-EA-A3QD-01	287	2	1
CESC	TCGA-EA-A3QE-01	143	3	0
CESC	TCGA-EA-A3Y4-01	383	11	0
CESC	TCGA-EA-A410-01	3486	2286	7
CESC	TCGA-EA-A411-01	122	4	1
CESC	TCGA-EA-A439-01	269	10	0
CESC	TCGA-EA-A43B-01	284	7	0
CESC	TCGA-EA-A44S-01	112	7	0
CESC	TCGA-EA-A4BA-01	130	13	1
CESC	TCGA-EA-A50E-01	293	2	1
CESC	TCGA-EA-A556-01	81	6	0
CESC	TCGA-EA-A5FO-01	254	11	2
CESC	TCGA-EA-A5O9-01	186	18	0
CESC	TCGA-EA-A5ZD-01	51	1	0
CESC	TCGA-EA-A5ZE-01	160	18	0
CESC	TCGA-EA-A5ZF-01	206	9	2
CESC	TCGA-EA-A6QX-01	239	9	1
CESC	TCGA-EA-A78R-01	150	6	1
CESC	TCGA-EA-A97N-01	309	7	0
CESC	TCGA-EK-A2GZ-01	186	9	0
CESC	TCGA-EK-A2H0-01	495	9	1
CESC	TCGA-EK-A2H1-01	81	0	0
CESC	TCGA-EK-A2IP-01	428	5	1
CESC	TCGA-EK-A2PG-01	1515	14	2
CESC	TCGA-EK-A2PI-01	240	8	0
CESC	TCGA-EK-A2PK-01	78	5	0
CESC	TCGA-EK-A2PL-01	526	11	0
CESC	TCGA-EK-A2PM-01	979	26	6
CESC	TCGA-EK-A2R7-01	319	9	1
CESC	TCGA-EK-A2R8-01	843	9	2
CESC	TCGA-EK-A2R9-01	122	7	0
CESC	TCGA-EK-A2RA-01	510	15	1
CESC	TCGA-EK-A2RB-01	274	15	2
CESC	TCGA-EK-A2RC-01	539	7	1
CESC	TCGA-EK-A2RE-01	58	8	1
CESC	TCGA-EK-A2RJ-01	773	5	1
CESC	TCGA-EK-A2RK-01	643	9	1
CESC	TCGA-EK-A2RL-01	93	7	0
CESC	TCGA-EK-A2RM-01	237	14	0
CESC	TCGA-EK-A2RN-01	379	4	0
CESC	TCGA-EK-A2RO-01	333	13	1
CESC	TCGA-EK-A3GJ-01	704	14	2
CESC	TCGA-EK-A3GK-01	3762	17	17
CESC	TCGA-EK-A3GM-01	489	9	1
CESC	TCGA-EK-A3GN-01	202	6	2
CESC	TCGA-EX-A1H5-01	92	14	0
CESC	TCGA-EX-A1H6-01	244	8	1
CESC	TCGA-EX-A3L1-01	84	3	1
CESC	TCGA-EX-A449-01	102	4	0
CESC	TCGA-EX-A69L-01	171	1	2
CESC	TCGA-EX-A69M-01	157	6	0
CESC	TCGA-EX-A8YF-01	134	4	0
CESC	TCGA-FU-A23K-01	229	3	1
CESC	TCGA-FU-A23L-01	298	5	1
CESC	TCGA-FU-A2QG-01	274	5	1
CESC	TCGA-FU-A3EO-01	163	8	0
CESC	TCGA-FU-A3HY-01	528	5	3
CESC	TCGA-FU-A3HZ-01	6447	78	12
CESC	TCGA-FU-A3NI-01	253	15	1
CESC	TCGA-FU-A3TQ-01	153	7	4
CESC	TCGA-FU-A3TX-01	167	8	1
CESC	TCGA-FU-A3WB-01	219	5	2
CESC	TCGA-FU-A3YQ-01	152	5	1
CESC	TCGA-FU-A40J-01	505	10	0
CESC	TCGA-FU-A57G-01	75	10	0
CESC	TCGA-FU-A5XV-01	298	17	3
CESC	TCGA-FU-A770-01	133	7	0
CESC	TCGA-GH-A9DA-01	220	9	0
CESC	TCGA-HG-A2PA-01	161	3	2
CESC	TCGA-HM-A3JJ-01	134	6	0
CESC	TCGA-HM-A3JK-01	144	5	2
CESC	TCGA-HM-A4S6-01	2201	11	9
CESC	TCGA-HM-A6W2-01	168	14	0
CESC	TCGA-IR-A3L7-01	82	5	0
CESC	TCGA-IR-A3LA-01	3685	18	5
CESC	TCGA-IR-A3LB-01	142	5	0
CESC	TCGA-IR-A3LC-01	111	11	1
CESC	TCGA-IR-A3LF-01	250	6	0
CESC	TCGA-IR-A3LH-01	2167	13	10
CESC	TCGA-IR-A3LI-01	1071	11	3
CESC	TCGA-IR-A3LK-01	4488	33	20
CESC	TCGA-IR-A3LL-01	875	2	2
CESC	TCGA-JW-A5VG-01	56	1	0
CESC	TCGA-JW-A5VH-01	175	14	1
CESC	TCGA-JW-A5VI-01	183	12	1
CESC	TCGA-JW-A5VJ-01	533	8	3
CESC	TCGA-JW-A5VK-01	165	12	1
CESC	TCGA-JW-A5VL-01	6635	26	15
CESC	TCGA-JW-A69B-01	133	7	0
CESC	TCGA-JW-A852-01	242	9	1
CESC	TCGA-JW-AAVH-01	280	18	1
CESC	TCGA-JX-A3PZ-01	154	2	1
CESC	TCGA-JX-A3Q0-01	2217	17	2
CESC	TCGA-JX-A3Q8-01	155	4	1
CESC	TCGA-JX-A5QV-01	110	2	0
CESC	TCGA-LP-A4AU-01	96	1	0
CESC	TCGA-LP-A4AV-01	1055	10	0
CESC	TCGA-LP-A4AW-01	290	14	0
CESC	TCGA-LP-A4AX-01	91	6	2
CESC	TCGA-LP-A5U2-01	570	3	1
CESC	TCGA-LP-A5U3-01	135	2	0
CESC	TCGA-LP-A7HU-01	416	12	1
CESC	TCGA-MA-AA3W-01	125	4	2
CESC	TCGA-MA-AA3X-01	164	11	1
CESC	TCGA-MA-AA3Y-01	464	9	2
CESC	TCGA-MA-AA3Z-01	560	11	1
CESC	TCGA-MA-AA41-01	1248	8	2
CESC	TCGA-MA-AA42-01	1038	342	0
CESC	TCGA-MA-AA43-01	143	10	0
CESC	TCGA-MU-A51Y-01	417	3	0
CESC	TCGA-MU-A5YI-01	203	9	1
CESC	TCGA-MU-A8JM-01	303	8	1
CESC	TCGA-MY-A5BD-01	1070	15	2
CESC	TCGA-MY-A5BE-01	123	4	0
CESC	TCGA-MY-A5BF-01	615	10	3
CESC	TCGA-MY-A913-01	477	6	0
CESC	TCGA-PN-A8MA-01	383	15	1
CESC	TCGA-Q1-A5R1-01	129	2	0
CESC	TCGA-Q1-A5R2-01	677	6	2
CESC	TCGA-Q1-A5R3-01	168	15	0
CESC	TCGA-Q1-A6DT-01	428	24	0
CESC	TCGA-Q1-A6DV-01	89	8	2
CESC	TCGA-Q1-A6DW-01	325	9	0
CESC	TCGA-Q1-A73O-01	4221	13	25
CESC	TCGA-Q1-A73P-01	803	15	4
CESC	TCGA-Q1-A73Q-01	196	15	0
CESC	TCGA-Q1-A73R-01	164	10	2
CESC	TCGA-Q1-A73S-01	77	6	0
CESC	TCGA-R2-A69V-01	180	4	0
CESC	TCGA-RA-A741-01	80	7	0
CESC	TCGA-UC-A7PD-01	100	1	1
CESC	TCGA-UC-A7PF-01	1244	10	1
CESC	TCGA-UC-A7PG-01	552	7	2
CESC	TCGA-UC-A7PI-01	159	6	0
CESC	TCGA-VS-A8EB-01	238	7	2
CESC	TCGA-VS-A8EC-01	428	18	2
CESC	TCGA-VS-A8EG-01	101	12	0
CESC	TCGA-VS-A8EH-01	178	12	1
CESC	TCGA-VS-A8EI-01	230	4	0
CESC	TCGA-VS-A8EJ-01	384	20	2
CESC	TCGA-VS-A8EK-01	713	33	0
CESC	TCGA-VS-A8EL-01	855	8	0
CESC	TCGA-VS-A8Q8-01	275	8	1
CESC	TCGA-VS-A8Q9-01	163	11	0
CESC	TCGA-VS-A8QA-01	521	10	1
CESC	TCGA-VS-A8QC-01	384	17	1
CESC	TCGA-VS-A8QF-01	241	9	0
CESC	TCGA-VS-A8QH-01	344	14	2
CESC	TCGA-VS-A8QM-01	180	3	0
CESC	TCGA-VS-A94W-01	170	3	0
CESC	TCGA-VS-A94X-01	835	15	4
CESC	TCGA-VS-A94Y-01	130	7	0
CESC	TCGA-VS-A94Z-01	1314	518	5
CESC	TCGA-VS-A950-01	291	11	0
CESC	TCGA-VS-A952-01	386	13	2
CESC	TCGA-VS-A953-01	1105	11	6
CESC	TCGA-VS-A954-01	238	9	1
CESC	TCGA-VS-A957-01	158	10	0
CESC	TCGA-VS-A958-01	2501	15	8
CESC	TCGA-VS-A959-01	422	6	1
CESC	TCGA-VS-A9U5-01	218	10	0
CESC	TCGA-VS-A9U6-01	1101	590	6
CESC	TCGA-VS-A9U7-01	538	8	0
CESC	TCGA-VS-A9UB-01	327	12	3
CESC	TCGA-VS-A9UC-01	454	6	2
CESC	TCGA-VS-A9UD-01	546	11	0
CESC	TCGA-VS-A9UH-01	519	5	1
CESC	TCGA-VS-A9UI-01	298	8	0
CESC	TCGA-VS-A9UJ-01	774	671	5
CESC	TCGA-VS-A9UL-01	305	7	0
CESC	TCGA-VS-A9UM-01	196	9	0
CESC	TCGA-VS-A9UO-01	142	7	3
CESC	TCGA-VS-A9UP-01	530	12	3
CESC	TCGA-VS-A9UQ-01	58	0	0
CESC	TCGA-VS-A9UR-01	314	16	2
CESC	TCGA-VS-A9UT-01	92	7	1
CESC	TCGA-VS-A9UU-01	103	6	0
CESC	TCGA-VS-A9UV-01	244	16	0
CESC	TCGA-VS-A9UY-01	386	15	1
CESC	TCGA-VS-A9UZ-01	525	19	2
CESC	TCGA-VS-A9V0-01	144	8	1
CESC	TCGA-VS-A9V1-01	495	6	0
CESC	TCGA-VS-A9V2-01	125	12	1
CESC	TCGA-VS-A9V3-01	520	17	3
CESC	TCGA-VS-A9V4-01	302	19	1
CESC	TCGA-VS-A9V5-01	421	11	0
CESC	TCGA-VS-AA62-01	198	3	2
CESC	TCGA-WL-A834-01	276	11	5
CESC	TCGA-XS-A8TJ-01	187	4	0
CESC	TCGA-ZJ-A8QO-01	172	13	0
CESC	TCGA-ZJ-A8QQ-01	505	8	1
CESC	TCGA-ZJ-A8QR-01	435	12	2
CESC	TCGA-ZJ-AAX4-01	151	4	0
CESC	TCGA-ZJ-AAX8-01	161	8	0
CESC	TCGA-ZJ-AAXA-01	224	8	0
CESC	TCGA-ZJ-AAXB-01	406	29	2
CESC	TCGA-ZJ-AAXD-01	233	6	0
CESC	TCGA-ZJ-AAXF-01	103	3	1
CESC	TCGA-ZJ-AAXI-01	172	7	0
CESC	TCGA-ZJ-AAXJ-01	299	13	0
CESC	TCGA-ZJ-AAXN-01	170	9	0
CESC	TCGA-ZJ-AAXT-01	476	7	0
CESC	TCGA-ZJ-AAXU-01	1037	12	3
CESC	TCGA-ZJ-AB0H-01	263	8	0
CESC	TCGA-ZJ-AB0I-01	317	12	1
CESC	TCGA-ZX-AA5X-01	118	9	0
CHOL	TCGA-3X-AAV9-01	68	4	0
CHOL	TCGA-3X-AAVA-01	94	4	0
CHOL	TCGA-3X-AAVB-01	52	6	0
CHOL	TCGA-3X-AAVC-01	127	18	0
CHOL	TCGA-3X-AAVE-01	97	10	0
CHOL	TCGA-4G-AAZO-01	106	11	0
CHOL	TCGA-4G-AAZT-01	88	8	0
CHOL	TCGA-W5-AA2G-01	96	14	0
CHOL	TCGA-W5-AA2H-01	1	0	0
CHOL	TCGA-W5-AA2I-01	101	13	0
CHOL	TCGA-W5-AA2O-01	82	8	0
CHOL	TCGA-W5-AA2Q-01	85	10	1
CHOL	TCGA-W5-AA2R-01	62	5	0
CHOL	TCGA-W5-AA2T-01	120	7	0
CHOL	TCGA-W5-AA2U-01	213	16	1
CHOL	TCGA-W5-AA2W-01	73	9	1
CHOL	TCGA-W5-AA2X-01	117	13	2
CHOL	TCGA-W5-AA2Z-01	56	6	0
CHOL	TCGA-W5-AA30-01	131	9	2
CHOL	TCGA-W5-AA31-01	96	6	0
CHOL	TCGA-W5-AA33-01	64	2	1
CHOL	TCGA-W5-AA34-01	109	10	0
CHOL	TCGA-W5-AA36-01	144	9	0
CHOL	TCGA-W5-AA38-01	81	13	0
CHOL	TCGA-W5-AA39-01	2467	168	7
CHOL	TCGA-W6-AA0S-01	90	12	1
CHOL	TCGA-WD-A7RX-01	101	2	0
CHOL	TCGA-YR-A95A-01	68	5	0
CHOL	TCGA-ZD-A8I3-01	93	13	0
CHOL	TCGA-ZH-A8Y1-01	133	5	0
CHOL	TCGA-ZH-A8Y2-01	133	23	0
CHOL	TCGA-ZH-A8Y4-01	148	18	0
CHOL	TCGA-ZH-A8Y5-01	72	8	1
CHOL	TCGA-ZH-A8Y6-01	149	5	0
CHOL	TCGA-ZH-A8Y8-01	73	4	0
CHOL	TCGA-ZU-A8S4-01	69	4	0
COAD	TCGA-3L-AA1B-01	255	12	1
COAD	TCGA-4N-A93T-01	245	15	2
COAD	TCGA-4T-AA8H-01	262	24	0
COAD	TCGA-5M-AAT4-01	395	30	1
COAD	TCGA-5M-AAT5-01	219	17	0
COAD	TCGA-5M-AAT6-01	3286	1685	13
COAD	TCGA-5M-AATA-01	171	11	0
COAD	TCGA-5M-AATE-01	308	19	0
COAD	TCGA-A6-2671-01	196	16	1
COAD	TCGA-A6-2672-01	1962	1262	12
COAD	TCGA-A6-2674-01	147	8	1
COAD	TCGA-A6-2675-01	205	6	0
COAD	TCGA-A6-2677-01	384	19	0
COAD	TCGA-A6-2678-01	54	2	0
COAD	TCGA-A6-2679-01	297	15	0
COAD	TCGA-A6-2680-01	233	19	0
COAD	TCGA-A6-2681-01	307	13	0
COAD	TCGA-A6-2682-01	149	10	0
COAD	TCGA-A6-2683-01	66	4	0
COAD	TCGA-A6-2684-01	311	25	1
COAD	TCGA-A6-2685-01	110	5	0
COAD	TCGA-A6-2686-01	4157	2959	14
COAD	TCGA-A6-3809-01	1452	922	1
COAD	TCGA-A6-3810-01	265	9	1
COAD	TCGA-A6-4105-01	354	16	1
COAD	TCGA-A6-4107-01	355	18	0
COAD	TCGA-A6-5656-01	275	15	0
COAD	TCGA-A6-5657-01	222	17	0
COAD	TCGA-A6-5659-01	363	17	3
COAD	TCGA-A6-5660-01	304	23	0
COAD	TCGA-A6-5661-01	2780	1617	6
COAD	TCGA-A6-5662-01	158	12	0
COAD	TCGA-A6-5664-01	103	5	1
COAD	TCGA-A6-5665-01	4295	2770	15
COAD	TCGA-A6-5666-01	279	29	1
COAD	TCGA-A6-5667-01	168	16	0
COAD	TCGA-A6-6137-01	243	16	0
COAD	TCGA-A6-6138-01	282	17	2
COAD	TCGA-A6-6140-01	322	24	2
COAD	TCGA-A6-6141-01	3319	29	3
COAD	TCGA-A6-6142-01	182	20	1
COAD	TCGA-A6-6648-01	222	18	0
COAD	TCGA-A6-6649-01	271	13	2
COAD	TCGA-A6-6650-01	187	20	1
COAD	TCGA-A6-6651-01	10	9	0
COAD	TCGA-A6-6652-01	195	7	0
COAD	TCGA-A6-6653-01	2486	1466	5
COAD	TCGA-A6-6654-01	282	15	1
COAD	TCGA-A6-6780-01	2171	1650	10
COAD	TCGA-A6-6781-01	1292	753	10
COAD	TCGA-A6-6782-01	308	17	0
COAD	TCGA-A6-A565-01	417	146	0
COAD	TCGA-A6-A566-01	305	24	0
COAD	TCGA-A6-A567-01	125	6	0
COAD	TCGA-A6-A56B-01	219	16	1
COAD	TCGA-AA-3488-01	225	15	1
COAD	TCGA-AA-3489-01	210	16	1
COAD	TCGA-AA-3492-01	4833	2582	7
COAD	TCGA-AA-3494-01	210	16	0
COAD	TCGA-AA-3495-01	240	21	1
COAD	TCGA-AA-3496-01	275	25	0
COAD	TCGA-AA-3502-01	433	29	0
COAD	TCGA-AA-3506-01	347	25	2
COAD	TCGA-AA-3509-01	192	19	1
COAD	TCGA-AA-3510-01	9802	41	7
COAD	TCGA-AA-3511-01	288	21	2
COAD	TCGA-AA-3514-01	56	1	1
COAD	TCGA-AA-3517-01	35	2	0
COAD	TCGA-AA-3519-01	43	0	0
COAD	TCGA-AA-3520-01	47	4	1
COAD	TCGA-AA-3521-01	31	2	0
COAD	TCGA-AA-3524-01	41	2	0
COAD	TCGA-AA-3526-01	40	3	0
COAD	TCGA-AA-3527-01	45	1	0
COAD	TCGA-AA-3529-01	41	0	0
COAD	TCGA-AA-3531-01	38	2	0
COAD	TCGA-AA-3532-01	25	3	0
COAD	TCGA-AA-3534-01	54	3	0
COAD	TCGA-AA-3538-01	24	5	0
COAD	TCGA-AA-3544-01	48	3	0
COAD	TCGA-AA-3548-01	37	3	1
COAD	TCGA-AA-3549-01	32	1	0
COAD	TCGA-AA-3556-01	31	1	0
COAD	TCGA-AA-3560-01	36	1	0
COAD	TCGA-AA-3655-01	166	13	0
COAD	TCGA-AA-3660-01	287	18	0
COAD	TCGA-AA-3662-01	196	10	1
COAD	TCGA-AA-3663-01	4107	2566	21
COAD	TCGA-AA-3697-01	470	49	2
COAD	TCGA-AA-3712-01	339	17	0
COAD	TCGA-AA-3713-01	2009	1589	12
COAD	TCGA-AA-3947-01	4737	2420	8
COAD	TCGA-AA-3984-01	15129	107	18
COAD	TCGA-AA-A00N-01	12452	84	11
COAD	TCGA-AA-A010-01	24423	337	13
COAD	TCGA-AA-A01P-01	1686	832	1
COAD	TCGA-AA-A01R-01	4164	528	9
COAD	TCGA-AA-A022-01	3135	2183	9
COAD	TCGA-AD-5900-01	3310	1860	11
COAD	TCGA-AD-6548-01	231	14	1
COAD	TCGA-AD-6888-01	244	22	0
COAD	TCGA-AD-6889-01	3912	2777	17
COAD	TCGA-AD-6890-01	235	17	0
COAD	TCGA-AD-6895-01	3524	1177	17
COAD	TCGA-AD-6899-01	339	15	0
COAD	TCGA-AD-6901-01	616	30	1
COAD	TCGA-AD-6963-01	173	7	2
COAD	TCGA-AD-6964-01	2837	1115	4
COAD	TCGA-AD-6965-01	266	22	3
COAD	TCGA-AD-A5EJ-01	2814	1751	15
COAD	TCGA-AD-A5EK-01	256	7	0
COAD	TCGA-AM-5820-01	185	12	0
COAD	TCGA-AM-5821-01	2686	1172	3
COAD	TCGA-AU-3779-01	259	10	0
COAD	TCGA-AU-6004-01	1785	1292	7
COAD	TCGA-AY-5543-01	330	15	0
COAD	TCGA-AY-6196-01	471	26	1
COAD	TCGA-AY-6197-01	2249	1726	10
COAD	TCGA-AY-6386-01	250	16	1
COAD	TCGA-AY-A54L-01	277	25	0
COAD	TCGA-AY-A69D-01	449	33	2
COAD	TCGA-AY-A71X-01	220	20	0
COAD	TCGA-AY-A8YK-01	210	8	2
COAD	TCGA-AZ-4308-01	138	6	0
COAD	TCGA-AZ-4313-01	2027	837	6
COAD	TCGA-AZ-4315-01	21256	209	11
COAD	TCGA-AZ-4323-01	98	6	1
COAD	TCGA-AZ-4614-01	468	34	0
COAD	TCGA-AZ-4615-01	1720	1632	2
COAD	TCGA-AZ-4616-01	195	9	0
COAD	TCGA-AZ-4681-01	210	22	0
COAD	TCGA-AZ-4682-01	218	10	0
COAD	TCGA-AZ-4684-01	204	13	2
COAD	TCGA-AZ-5403-01	182	11	1
COAD	TCGA-AZ-5407-01	171	10	1
COAD	TCGA-AZ-6598-01	5027	4093	15
COAD	TCGA-AZ-6599-01	708	15	3
COAD	TCGA-AZ-6600-01	319	22	2
COAD	TCGA-AZ-6601-01	4267	384	17
COAD	TCGA-AZ-6603-01	140	20	0
COAD	TCGA-AZ-6605-01	181	12	0
COAD	TCGA-AZ-6606-01	293	16	2
COAD	TCGA-AZ-6607-01	170	8	1
COAD	TCGA-AZ-6608-01	429	30	2
COAD	TCGA-CA-5254-01	403	27	0
COAD	TCGA-CA-5255-01	103	8	0
COAD	TCGA-CA-5256-01	183	19	2
COAD	TCGA-CA-5796-01	165	11	1
COAD	TCGA-CA-5797-01	196	15	0
COAD	TCGA-CA-6715-01	190	16	0
COAD	TCGA-CA-6716-01	353	39	1
COAD	TCGA-CA-6717-01	22477	144	52
COAD	TCGA-CA-6718-01	9110	47	16
COAD	TCGA-CA-6719-01	225	20	1
COAD	TCGA-CK-4947-01	229	11	0
COAD	TCGA-CK-4948-01	231	10	0
COAD	TCGA-CK-4950-01	377	18	0
COAD	TCGA-CK-4951-01	10457	1434	30
COAD	TCGA-CK-4952-01	351	17	1
COAD	TCGA-CK-5912-01	189	16	0
COAD	TCGA-CK-5913-01	1994	1205	8
COAD	TCGA-CK-5914-01	375	37	1
COAD	TCGA-CK-5915-01	240	19	2
COAD	TCGA-CK-5916-01	3290	2082	9
COAD	TCGA-CK-6746-01	2755	1944	7
COAD	TCGA-CK-6747-01	276	150	2
COAD	TCGA-CK-6748-01	141	11	0
COAD	TCGA-CK-6751-01	356	26	1
COAD	TCGA-CM-4743-01	2375	1186	6
COAD	TCGA-CM-4744-01	294	28	0
COAD	TCGA-CM-4746-01	1601	1061	2
COAD	TCGA-CM-4747-01	212	8	1
COAD	TCGA-CM-4748-01	140	12	0
COAD	TCGA-CM-4750-01	213	17	0
COAD	TCGA-CM-4751-01	196	10	1
COAD	TCGA-CM-4752-01	244	21	0
COAD	TCGA-CM-5341-01	335	25	0
COAD	TCGA-CM-5344-01	160	15	0
COAD	TCGA-CM-5348-01	448	29	2
COAD	TCGA-CM-5349-01	261	16	1
COAD	TCGA-CM-5860-01	285	16	1
COAD	TCGA-CM-5861-01	3411	1708	16
COAD	TCGA-CM-5862-01	338	17	1
COAD	TCGA-CM-5863-01	116	7	1
COAD	TCGA-CM-5864-01	571	26	2
COAD	TCGA-CM-5868-01	196	21	1
COAD	TCGA-CM-6161-01	217	10	0
COAD	TCGA-CM-6163-01	234	5	0
COAD	TCGA-CM-6164-01	217	16	0
COAD	TCGA-CM-6165-01	308	11	2
COAD	TCGA-CM-6166-01	199	17	2
COAD	TCGA-CM-6167-01	145	7	0
COAD	TCGA-CM-6168-01	410	125	1
COAD	TCGA-CM-6169-01	231	17	1
COAD	TCGA-CM-6170-01	259	15	2
COAD	TCGA-CM-6171-01	2809	1583	11
COAD	TCGA-CM-6172-01	289	12	0
COAD	TCGA-CM-6674-01	1527	888	3
COAD	TCGA-CM-6675-01	213	23	1
COAD	TCGA-CM-6676-01	175	7	1
COAD	TCGA-CM-6677-01	273	16	0
COAD	TCGA-CM-6678-01	263	16	0
COAD	TCGA-CM-6679-01	115	7	0
COAD	TCGA-CM-6680-01	182	11	0
COAD	TCGA-D5-5537-01	245	19	0
COAD	TCGA-D5-5538-01	270	22	2
COAD	TCGA-D5-5539-01	314	19	0
COAD	TCGA-D5-5540-01	339	11	0
COAD	TCGA-D5-5541-01	172	13	0
COAD	TCGA-D5-6529-01	242	17	0
COAD	TCGA-D5-6530-01	2299	2407	4
COAD	TCGA-D5-6531-01	465	27	0
COAD	TCGA-D5-6532-01	328	21	1
COAD	TCGA-D5-6533-01	476	29	0
COAD	TCGA-D5-6534-01	313	12	1
COAD	TCGA-D5-6535-01	373	10	3
COAD	TCGA-D5-6536-01	270	21	0
COAD	TCGA-D5-6537-01	247	14	1
COAD	TCGA-D5-6538-01	360	26	3
COAD	TCGA-D5-6539-01	173	7	1
COAD	TCGA-D5-6540-01	2780	1726	4
COAD	TCGA-D5-6541-01	220	15	0
COAD	TCGA-D5-6898-01	175	19	0
COAD	TCGA-D5-6920-01	228	14	0
COAD	TCGA-D5-6922-01	242	14	1
COAD	TCGA-D5-6923-01	175	8	0
COAD	TCGA-D5-6924-01	332	26	2
COAD	TCGA-D5-6926-01	269	16	1
COAD	TCGA-D5-6927-01	1351	823	10
COAD	TCGA-D5-6928-01	2658	1106	19
COAD	TCGA-D5-6929-01	252	37	0
COAD	TCGA-D5-6930-01	2168	1173	4
COAD	TCGA-D5-6931-01	625	30	3
COAD	TCGA-D5-6932-01	344	35	1
COAD	TCGA-D5-7000-01	267	22	1
COAD	TCGA-DM-A0X9-01	447	24	2
COAD	TCGA-DM-A0XD-01	419	40	3
COAD	TCGA-DM-A0XF-01	283	22	1
COAD	TCGA-DM-A1D0-01	311	20	3
COAD	TCGA-DM-A1D4-01	444	40	3
COAD	TCGA-DM-A1D6-01	331	11	2
COAD	TCGA-DM-A1D7-01	314	11	1
COAD	TCGA-DM-A1D8-01	462	24	0
COAD	TCGA-DM-A1D9-01	395	37	3
COAD	TCGA-DM-A1DA-01	763	29	6
COAD	TCGA-DM-A1DB-01	175	21	1
COAD	TCGA-DM-A1HA-01	378	27	1
COAD	TCGA-DM-A1HB-01	2653	1452	17
COAD	TCGA-DM-A280-01	259	10	1
COAD	TCGA-DM-A282-01	234	18	0
COAD	TCGA-DM-A285-01	391	17	2
COAD	TCGA-DM-A288-01	229	16	1
COAD	TCGA-DM-A28A-01	319	22	3
COAD	TCGA-DM-A28C-01	257	12	1
COAD	TCGA-DM-A28E-01	186	26	0
COAD	TCGA-DM-A28F-01	587	34	5
COAD	TCGA-DM-A28G-01	284	18	1
COAD	TCGA-DM-A28H-01	281	21	1
COAD	TCGA-DM-A28K-01	238	18	1
COAD	TCGA-DM-A28M-01	212	15	2
COAD	TCGA-F4-6459-01	355	33	0
COAD	TCGA-F4-6460-01	332	15	1
COAD	TCGA-F4-6461-01	292	14	0
COAD	TCGA-F4-6463-01	151	17	0
COAD	TCGA-F4-6569-01	274	16	1
COAD	TCGA-F4-6570-01	3403	1876	16
COAD	TCGA-F4-6703-01	624	260	3
COAD	TCGA-F4-6704-01	148	6	1
COAD	TCGA-F4-6805-01	123	12	1
COAD	TCGA-F4-6806-01	192	18	0
COAD	TCGA-F4-6807-01	329	13	1
COAD	TCGA-F4-6808-01	271	9	0
COAD	TCGA-F4-6809-01	366	23	1
COAD	TCGA-F4-6854-01	235	15	1
COAD	TCGA-F4-6855-01	248	14	1
COAD	TCGA-F4-6856-01	1992	1350	5
COAD	TCGA-G4-6293-01	312	35	1
COAD	TCGA-G4-6294-01	429	15	1
COAD	TCGA-G4-6295-01	403	30	1
COAD	TCGA-G4-6297-01	163	17	1
COAD	TCGA-G4-6298-01	200	18	0
COAD	TCGA-G4-6299-01	404	29	3
COAD	TCGA-G4-6302-01	1132	697	2
COAD	TCGA-G4-6303-01	233	17	1
COAD	TCGA-G4-6304-01	1444	692	4
COAD	TCGA-G4-6306-01	294	26	1
COAD	TCGA-G4-6307-01	180	8	0
COAD	TCGA-G4-6309-01	1643	1026	5
COAD	TCGA-G4-6310-01	277	19	3
COAD	TCGA-G4-6311-01	372	22	3
COAD	TCGA-G4-6314-01	334	14	1
COAD	TCGA-G4-6315-01	310	20	0
COAD	TCGA-G4-6317-01	236	15	1
COAD	TCGA-G4-6320-01	2182	677	11
COAD	TCGA-G4-6321-01	103	2	0
COAD	TCGA-G4-6322-01	230	13	0
COAD	TCGA-G4-6323-01	184	10	1
COAD	TCGA-G4-6586-01	2554	1727	11
COAD	TCGA-G4-6588-01	4702	2354	21
COAD	TCGA-G4-6625-01	228	12	0
COAD	TCGA-G4-6626-01	358	19	2
COAD	TCGA-G4-6627-01	136	4	1
COAD	TCGA-G4-6628-01	3756	2229	26
COAD	TCGA-NH-A50T-01	279	13	1
COAD	TCGA-NH-A50U-01	224	17	1
COAD	TCGA-NH-A50V-01	332	27	1
COAD	TCGA-NH-A5IV-01	5211	4071	26
COAD	TCGA-NH-A6GA-01	244	16	1
COAD	TCGA-NH-A6GB-01	429	35	0
COAD	TCGA-NH-A6GC-01	329	28	1
COAD	TCGA-NH-A8F7-01	267	20	2
COAD	TCGA-NH-A8F8-01	242	15	1
COAD	TCGA-QG-A5YV-01	292	15	0
COAD	TCGA-QG-A5YW-01	314	21	4
COAD	TCGA-QG-A5YX-01	212	21	1
COAD	TCGA-QG-A5Z1-01	210	11	3
COAD	TCGA-QG-A5Z2-01	1803	842	12
COAD	TCGA-QL-A97D-01	502	29	3
COAD	TCGA-RU-A8FL-01	375	36	2
COAD	TCGA-SS-A7HO-01	498	37	0
COAD	TCGA-T9-A92H-01	507	35	4
COAD	TCGA-WS-AB45-01	3962	1827	2
DLBC	TCGA-FA-8693-01	408	22	4
DLBC	TCGA-FA-A4BB-01	236	19	0
DLBC	TCGA-FA-A4XK-01	313	17	0
DLBC	TCGA-FA-A6HN-01	456	33	4
DLBC	TCGA-FA-A6HO-01	174	10	0
DLBC	TCGA-FA-A7DS-01	346	21	1
DLBC	TCGA-FA-A7Q1-01	602	41	3
DLBC	TCGA-FA-A82F-01	451	22	2
DLBC	TCGA-FA-A86F-01	208	19	0
DLBC	TCGA-FF-8041-01	577	42	3
DLBC	TCGA-FF-8042-01	664	21	1
DLBC	TCGA-FF-8043-01	317	18	0
DLBC	TCGA-FF-8046-01	198	6	1
DLBC	TCGA-FF-8047-01	313	11	0
DLBC	TCGA-FF-8061-01	395	15	0
DLBC	TCGA-FF-8062-01	537	34	1
DLBC	TCGA-FF-A7CQ-01	381	29	2
DLBC	TCGA-FF-A7CR-01	561	25	0
DLBC	TCGA-FF-A7CW-01	144	12	1
DLBC	TCGA-FF-A7CX-01	392	22	1
DLBC	TCGA-FM-8000-01	522	21	1
DLBC	TCGA-G8-6324-01	198	10	0
DLBC	TCGA-G8-6325-01	298	6	0
DLBC	TCGA-G8-6326-01	74	4	0
DLBC	TCGA-G8-6906-01	320	19	1
[truncated: 6,978 more rows]
