# Supplementary material for: A comprehensive characterization of cis -acting splicing-associated variants in human cancer
Source: HighWire-hosted journal article supplement (doi:10.1101/gr.231951.117), 2018-07-16
Supplement: Supplemental_Table_S6.xlsx [file Supplemental_Table_S6.xlsx]

## Sheet: S6_Base_Hotspot_list
Supplementary Table 6. List of base-level hotspots (shared by ≥ 3 samples) at donor and acceptor sites
Gene	Transcript	Chr	Pos	Motif	Exon number	Canonical or not	Total count	Each substitution count
ALB	NM_000477	chr4	74274520	Donor	4	Canonical	3	AAAGT>A,3
ARID1A	NM_006015	chr1	27100390	Donor	17	Canonical	3	G>A,2;G>C,1
B2M	NM_004048	chr15	45007619	Acceptor	2	Canonical	3	A>G,3
CDKN2A	NM_000077	chr9	21970900	Donor	2	Canonical	3	C>A,2;C>T,1
CDKN2A	NM_000077	chr9	21970901	Donor	2	Non-canonical	3	C>T,3
CDKN2A	NM_000077	chr9	21971208	Acceptor	2	Canonical	10	C>A,2;C>G,1;C>T,7
CDKN2A	NM_000077	chr9	21971209	Acceptor	2	Canonical	8	T>A,6;T>C,2
CREB3L3	NM_032607	chr19	4171378	Acceptor	9	Canonical	3	A>G,2;A>T,1
CUL3	NM_003590	chr2	225367790	Acceptor	10	Canonical	3	C>T,3
FUBP1	NM_003902	chr1	78433847	Donor	3	Canonical	3	ACAGT>A,3
GATA3	NM_002051	chr10	8111432	Acceptor	5	Canonical	17	TCA>T,17
GTF3C2	NM_001521	chr2	27551330	Donor	17	Non-canonical	3	C>A,1;C>T,2
KANSL1	NM_015443	chr17	44144914	Donor	22	Canonical	5	C>A,3;C>T,2
KDM6A	NM_021140	chrX	44948987	Acceptor	25	Canonical	3	G>A,2;G>C,1
LRRC1	NM_018214	chr6	53785559	Donor	13	Non-canonical	3	G>A,1;G>T,2
MET	NM_000245	chr7	116412044	Donor	14	Canonical	3	G>A,1;G>C,1;G>T,1
MIEN1	NM_032339	chr17	37885931	Donor	3	Non-canonical	8	TACTC>T,8
MRE11	NM_005591	chr11	94212930	Acceptor	5	Non-canonical	4	TAA>T,4
NF1	NM_001042492	chr17	29654858	Donor	38	Canonical	3	G>A,2;G>T,1
PHF10	NM_018288	chr6	170115957	Acceptor	6	Non-canonical	3	GAA>G,3
PIGN	NM_012327	chr18	59742058	Acceptor	28	Non-canonical	3	GA>G,3
PIK3R1	NM_181523	chr5	67591246	Acceptor	14	Canonical	9	A>G,7;AGGT>A,2
PIK3R1	NM_181523	chr5	67591247	Acceptor	14	Canonical	3	G>C,1;G>T,2
PTEN	NM_000314	chr10	89653867	Donor	2	Canonical	3	G>A,2;G>T,1
PTEN	NM_000314	chr10	89717609	Acceptor	7	Canonical	3	G>A,1;G>C,1;G>T,1
RB1	NM_000321	chr13	48953728	Acceptor	14	Canonical	3	A>G,3
RIOK3	NM_003831	chr18	21043044	Donor	2	Canonical	3	G>A,3
SETD2	NM_014159	chr3	47155365	Donor	5	Canonical	3	C>G,1;C>T,2
STK11	NM_000455	chr19	1220371	Acceptor	4	Canonical	3	G>T,3
STRBP	NM_018387	chr9	125898322	Donor	16	Non-canonical	3	G>A,3
TAPT1	NM_153365	chr4	16189980	Acceptor	5	Non-canonical	6	TAA>T,5;TAAA>T,1
TP53	NM_000546	chr17	7574034	Acceptor	10	Canonical	4	C>G,3;C>T,1
TP53	NM_000546	chr17	7574035	Acceptor	10	Canonical	6	T>A,1;T>C,3;T>G,2
TP53	NM_000546	chr17	7576852	Donor	9	Canonical	8	C>A,5;C>T,3
TP53	NM_000546	chr17	7576853	Donor	9	Non-canonical	5	C>A,3;C>T,2
TP53	NM_000546	chr17	7576928	Acceptor	9	Canonical	8	T>A,2;T>C,6
TP53	NM_000546	chr17	7577017	Donor	8	Canonical	4	A>C,4
TP53	NM_000546	chr17	7577018	Donor	8	Canonical	6	C>A,4;C>T,2
TP53	NM_000546	chr17	7577156	Acceptor	8	Canonical	4	C>A,2;C>T,1;CTACTCAG>C,1
TP53	NM_000546	chr17	7577498	Donor	7	Canonical	4	C>A,1;C>T,3
TP53	NM_000546	chr17	7577609	Acceptor	7	Canonical	4	C>G,1;C>T,3
TP53	NM_000546	chr17	7577610	Acceptor	7	Canonical	9	T>A,2;T>C,7
TP53	NM_000546	chr17	7578176	Donor	6	Canonical	3	C>A,2;C>T,1
TP53	NM_000546	chr17	7578290	Acceptor	6	Canonical	9	C>A,3;C>G,1;C>T,5
TP53	NM_000546	chr17	7578291	Acceptor	6	Canonical	3	T>A,1;T>C,1;T>G,1
TP53	NM_000546	chr17	7578370	Donor	5	Canonical	9	C>A,3;C>T,6
TP53	NM_000546	chr17	7578555	Acceptor	5	Canonical	15	C>A,2;C>T,13
TP53	NM_000546	chr17	7578556	Acceptor	5	Canonical	13	T>A,4;T>C,7;T>G,2
TP53	NM_000546	chr17	7579307	Donor	4	Non-canonical	6	C>A,3;C>CT,1;C>G,1;C>T,1
TP53	NM_000546	chr17	7579311	Donor	4	Canonical	12	C>A,6;C>G,1;C>T,5
TP53	NM_000546	chr17	7579312	Donor	4	Non-canonical	31	C>A,22;C>G,3;C>T,6
TP53	NM_000546	chr17	7579591	Acceptor	4	Canonical	12	C>A,1;C>G,3;C>T,6;CT>C,1;CTGTAGATG>C,1
TP53	NM_000546	chr17	7579699	Donor	3	Canonical	5	C>A,3;C>T,2
